# Supplementary material for: Rare loss of function variants in the hepatokine gene INHBE protect from abdominal obesity
Source: PubMed Central journal article supplement (PMC9329324; doi:10.1038/s41467-022-31757-8), 2022-07-27
Supplement: 41467_2022_31757_MOESM1_ESM.pdf [file 41467_2022_31757_MOESM1_ESM.pdf]

## Rare loss of function variants in the hepatokine gene *INHBE* protect from abdominal obesity

Aimee M. Deaton<sup>1\*</sup>, Aditi Dubey<sup>1</sup>, Lucas D. Ward<sup>1</sup>, Peter Dornbos<sup>2,3,4</sup>, Jason Flannick<sup>2,3,4</sup>, AMP-T2D-GENES Consortium<sup>\*\*</sup>, Elaine Yee<sup>1</sup>, Simina Ticau<sup>1</sup>, Leila Noetzli<sup>1</sup>, Margaret M. Parker<sup>1</sup>, Rachel A. Hoffing<sup>1</sup>, Carissa Willis<sup>1</sup>, Mollie E. Plekan<sup>1</sup>, Aaron M. Holleman<sup>1</sup>, Gregory Hinkle<sup>1</sup>, Kevin Fitzgerald<sup>1</sup>, Akshay K. Vaishnav<sup>1</sup>, and Paul Nioi<sup>1</sup>

<sup>1</sup> Alnylam Pharmaceuticals, Cambridge, MA

<sup>2</sup> Programs in Metabolism and Medical & Population Genetics, Broad Institute, Cambridge, MA

<sup>3</sup> Division of Genetics and Genomics, Boston Children's Hospital, Boston, MA

<sup>4</sup> Department of Pediatrics, Harvard Medical School, Boston, MA

\* Correspondence to [adeaton@alnylam.com](mailto:adeaton@alnylam.com)

\*\* A full list of consortium members is provided in the Supplementary Information

## Supplementary Information

### Supplementary Figures

Supplementary Figure 1: Gene-level associations with waist-to-hip ratio adjusted for BMI by variant set

Gene-based burden analysis of WHRadjBMI was performed in 362,679 European ancestry individuals for pLOF, missense and pLOF + missense variant masks using a generalized linear model adjusting for the first 30 PCs of genetic ancestry. Genes significant in the overall analysis ( $P \leq 1.05 \times 10^{-6}$ ; Bonferroni correcting for the number of genes and variant masks tested) are labeled. The dashed line indicates the threshold for statistical significance.

Waist-to-hip ratio adjusted for BMI: pLOF variants

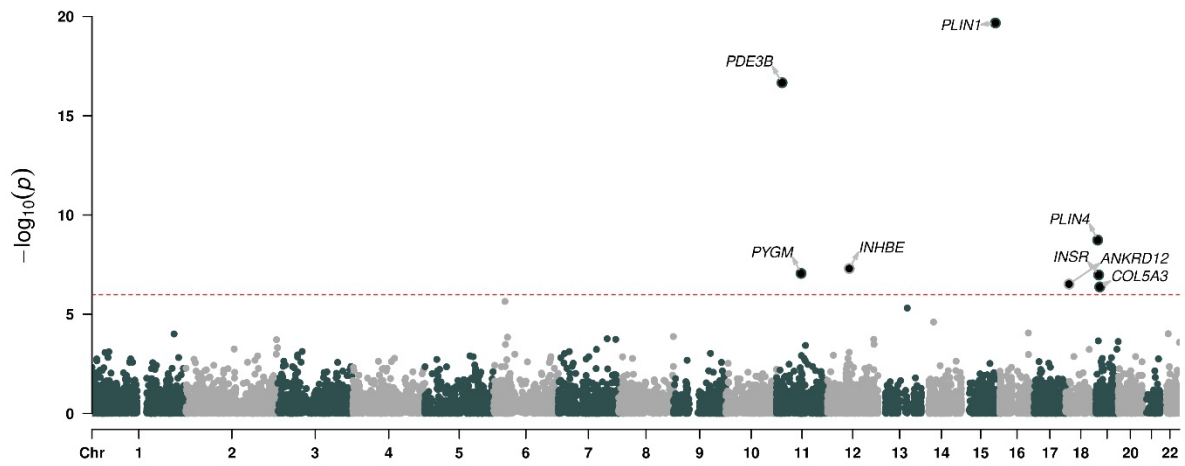

Waist-to-hip ratio adjusted for BMI: missense variants

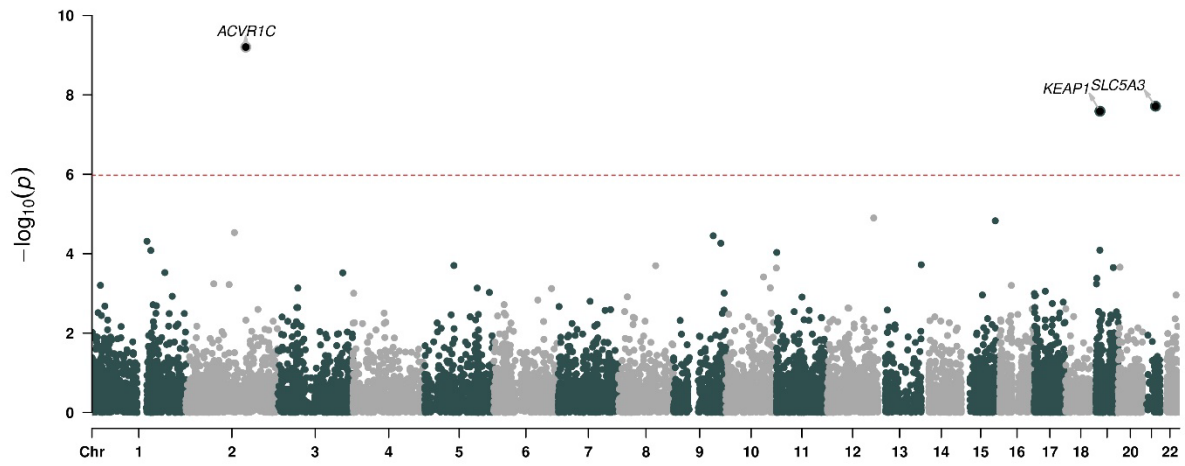

Waist-to-hip ratio adjusted for BMI: pLOF+missense variants

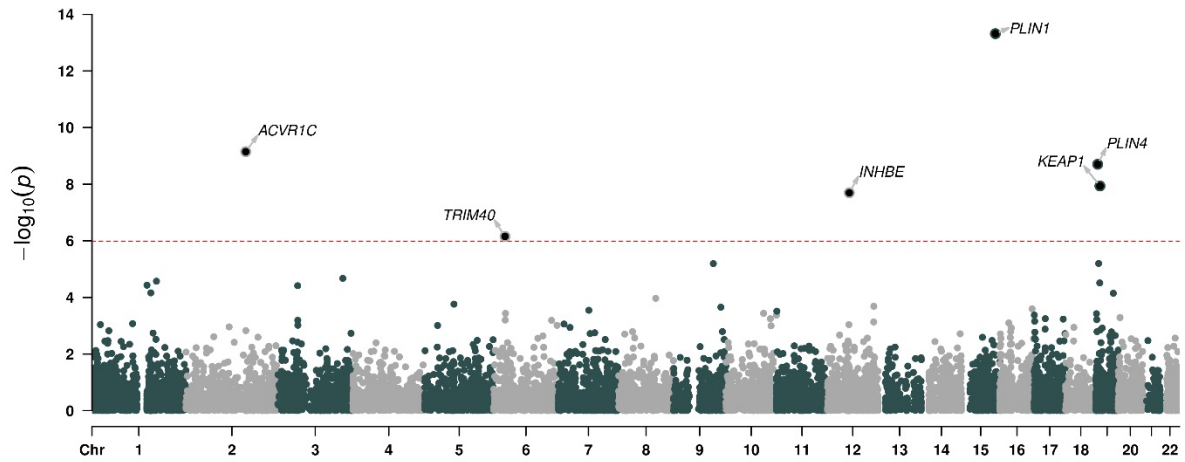

Supplementary Figure 2: QQ plots for sex-combined and sex-stratified analysis of WHRadjBMI

Gene-based burden analysis of WHRadjBMI was performed in 362,679 European ancestry individuals for pLOF, missense and pLOF + missense variant masks using a generalized linear model adjusting for the first 30 PCs of genetic ancestry. Analysis was performed in the entire population (sex-combined) or separately in men and women. N represents the number of rare variant carriers per gene and lambda is the genomic inflation factor.

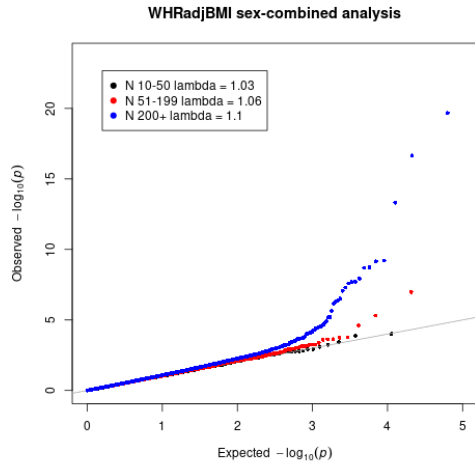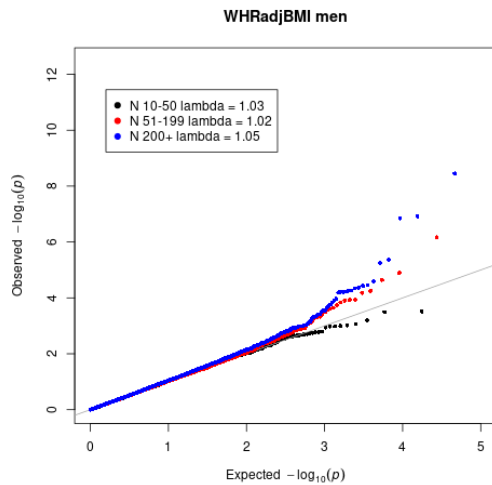

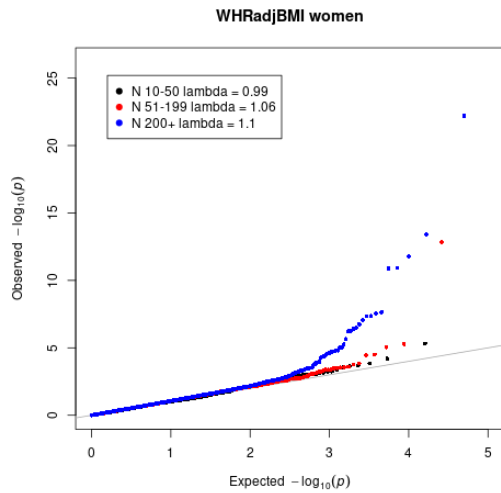

Supplementary Figure 3: Gene-level associations with WHRadjBMI in men

Gene-based burden analysis of WHRadjBMI in men (N = 166,533) was performed for pLOF, missense and pLOF + missense variant masks using a generalized linear model adjusting for the first 30 PCs of genetic ancestry. The best variant set per gene is shown and significant genes are labeled ( $P \leq 1.05 \times 10^{-6}$ ; Bonferroni correcting for the number of genes and variant masks tested). The dashed line indicates the threshold for statistical significance.

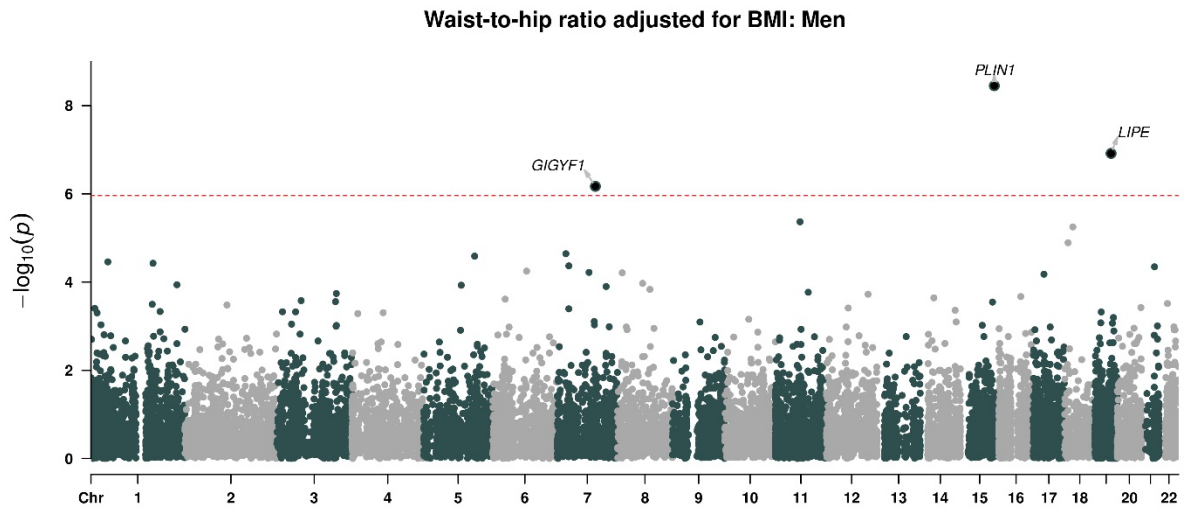

### Supplementary Figure 4: Gene-level associations with WHRadjBMI in women

Gene-based burden analysis of WHRadjBMI in women (N = 195,777) was performed for pLOF, missense and pLOF + missense variant masks using a generalized linear model adjusting for the first 30 PCs of genetic ancestry. The best variant set per gene is shown and significant genes are labeled ( $P \leq 1.05 \times 10^{-6}$ ; Bonferroni correcting for the number of genes and variant masks tested). The dashed line indicates the threshold for statistical significance.

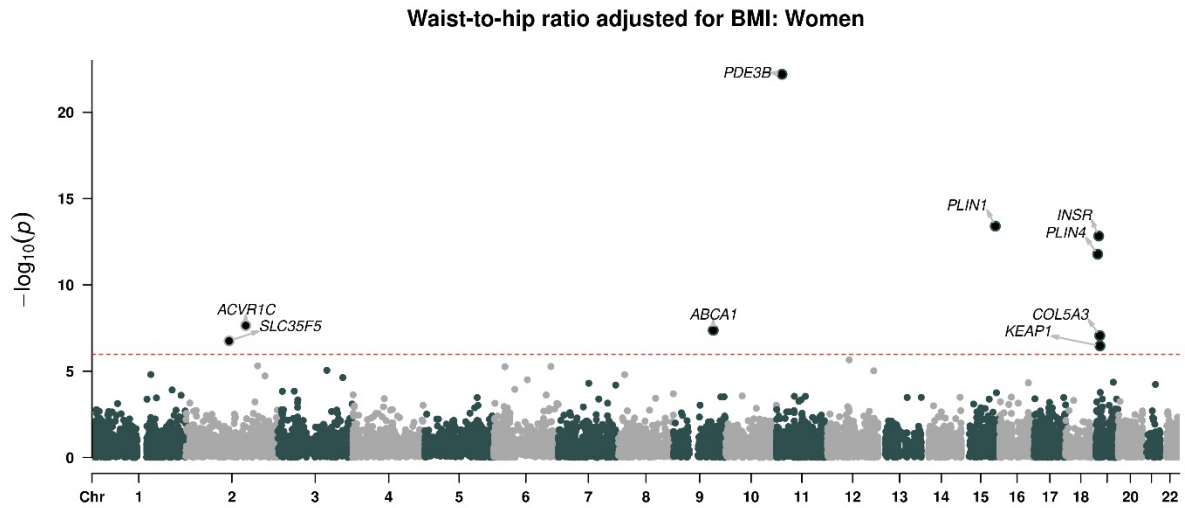

### Supplementary Figure 5: Leave-one-variant-out analysis for selected genes

We performed leave-one-variant-out analysis for selected WHRadjBMI-associated genes. Gene-based burden analysis of WHRadjBMI was performed using a generalized linear model excluding one variant at a time from the analysis. The genomic position of the excluded variant is plotted versus  $-\log_{10}(P)$  for the association when that variant is excluded. The variant sets contributing most of the signal in gene-based tests are labeled.

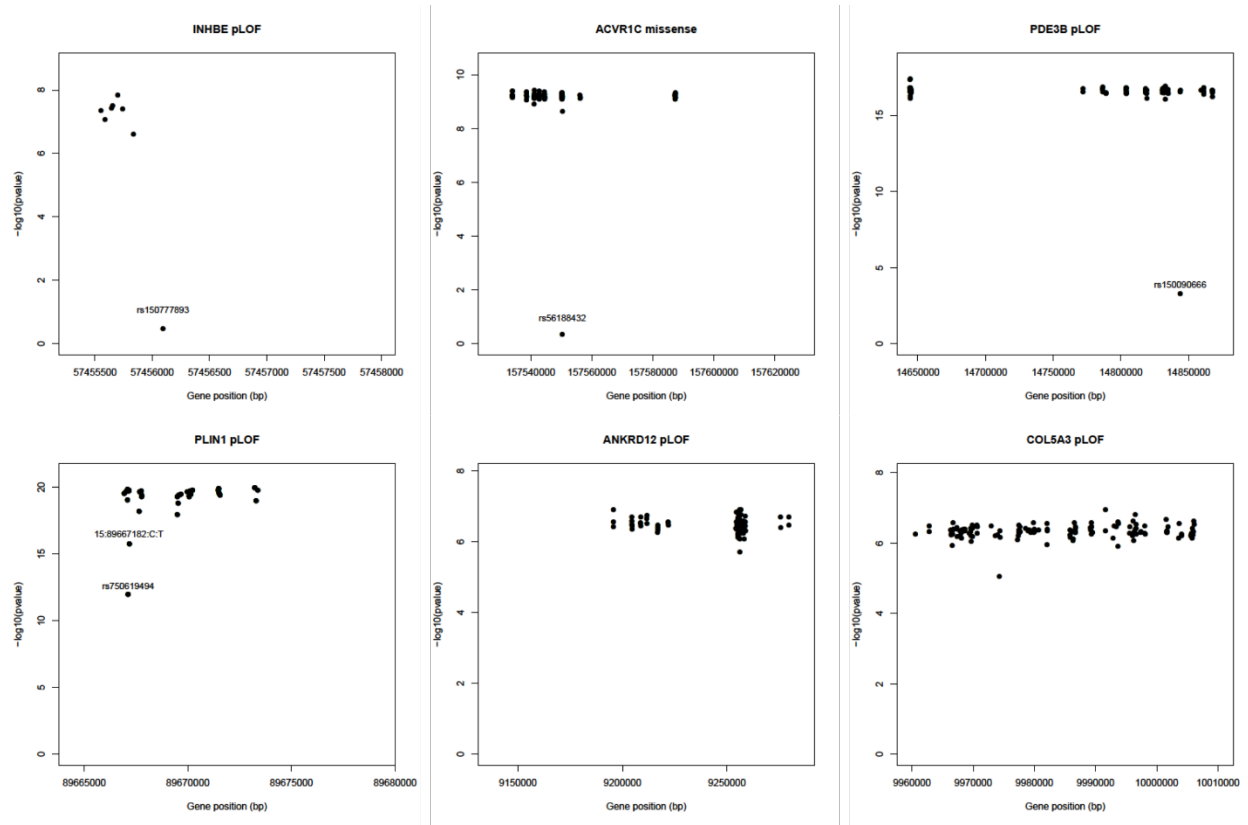

Supplementary Figure 6: Association of significant genes with unadjusted WHR and BMI  
For genes associated with WHRadjBMI, we plotted the effect on WHR (without BMI adjustment) compared to the effect on BMI (both in standard deviations; SD) calculated in 362,679 European ancestry participants. Effects are shown for *INHBE* pLOF and, for the other genes, the most significant variant set per gene. Grey bars represent the 95% confidence interval.

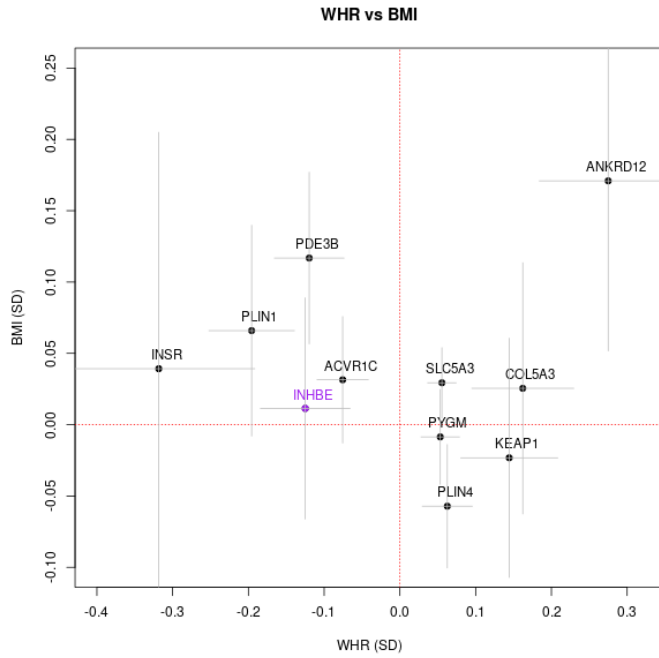



Supplementary Figure 7: Association of significant genes with adipose tissue distribution assessed by MRI

For genes associated with WHRadjBMI, we plotted the effect on WHRadjBMI (tested in 362,679 European ancestry participants) compared to the effect on VATadjBMI and ASATadjBMI (tested in 33,318 European ancestry participants with abdominal MRI). Effects are shown for *INHBE* pLOF and, for the other genes, the most significant variant set per gene. Grey bars represent the 95% confidence interval. *INSR* pLOF is not shown because there were insufficient numbers of carriers with information on adipose distribution assessed by MRI. VATadjBMI, visceral adipose tissue adjusted for BMI; ASATadjBMI, abdominal subcutaneous adipose tissue adjusted for BMI.

WHRadjBMI vs VAT

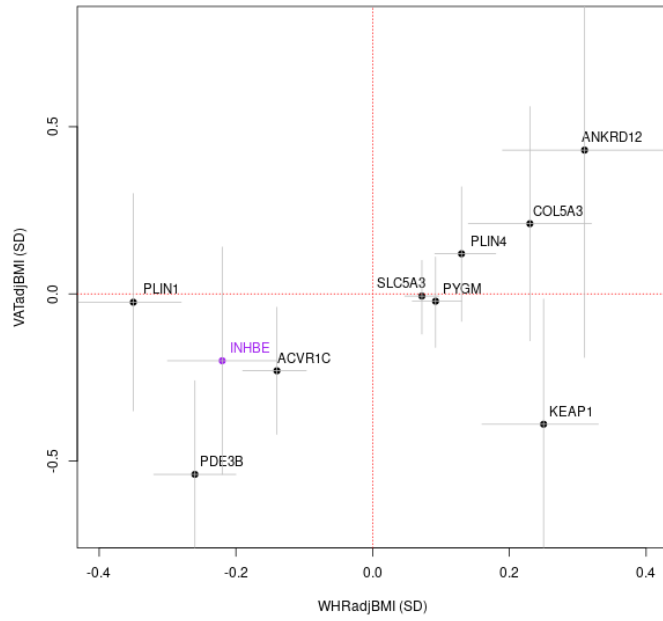

WHRadjBMI vs ASAT

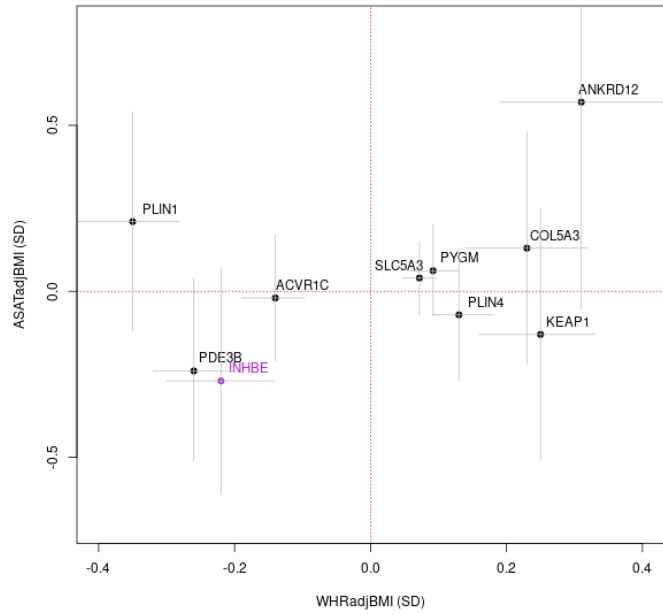

Supplementary Figure 8: Survival analysis of *INHBE* pLOF carriers vs non-carriers in UKB  
 The effect of *INHBE* pLOF genotype on survival was examined using a Cox proportional hazards regression looking at time from enrollment to death in UKB adjusting for age at enrollment, sex and 30 PCs of genetic ancestry.

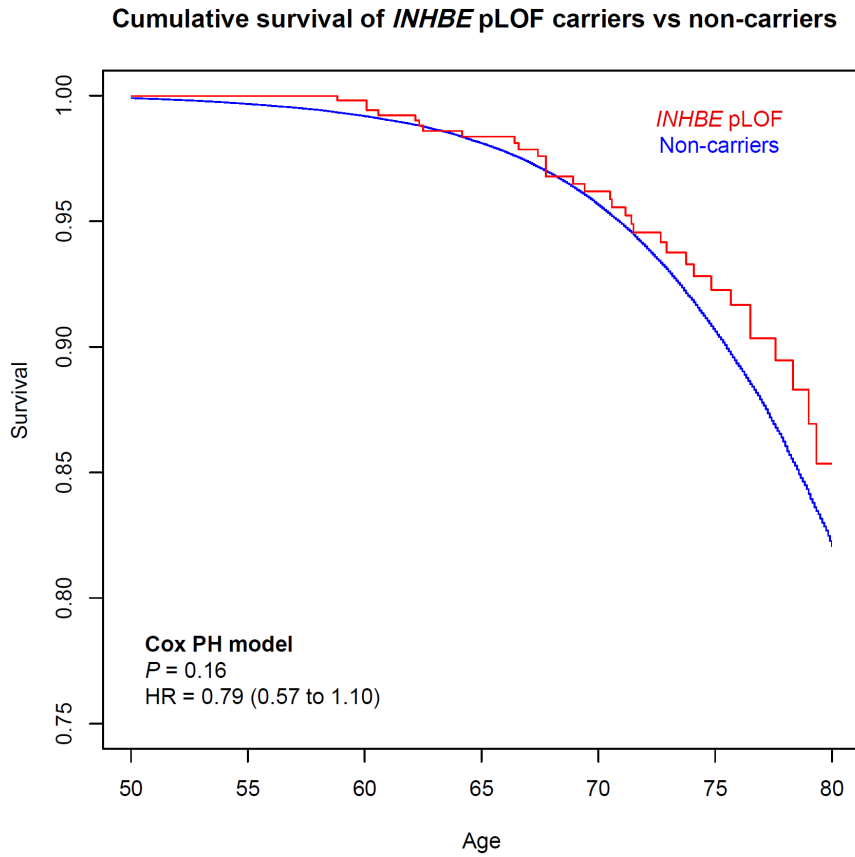

Supplementary Figure 9: Inhibin  $\beta E$  cross-species protein alignment  
 The DSTS residues deleted by the splice acceptor variant are highlighted.

|                             | 80                        | 90                        | 100                       | 108               | 112             | 120 |
|-----------------------------|---------------------------|---------------------------|---------------------------|-------------------|-----------------|-----|
| Consensus Identity          | A L T R A L R R L Q - - - | P X S X X P G N X E - - - | E V I S F A T V X         | D X S T S         | X Y X S X L T F |     |
| 1. <i>INHBE</i> _Chicken    | A V A R A L R R L Q A D G | P R R G D P P E D E R R F | E I I S F A E - -         | E E P T S         | S P G T V L R F |     |
| 2. <i>INHBE</i> _Mouse      | A L T R A L R R L Q - - - | P K S M V P G N R E - - - | K V I S F A T I I D K S T | S T Y R S M L T F |                 |     |
| 3. <i>INHBE</i> _Rat        | A L T R A L R R L Q - - - | P R S M V P G N R E - - - | K V I S F A T S I D K S T | T Y R S V L T F   |                 |     |
| 4. <i>INHBE</i> _CynoMonkey | A L T R A L R R L Q - - - | P G S V A P G N G E - - - | E V I S F A T V T D - S T | S A Y S S L L T F |                 |     |
| 5. <i>INHBE</i> _Human      | A L T R A L R R L Q - - - | P G S V A P G N G E - - - | E V I S F A T V T D - S T | S A Y S S L L T F |                 |     |

Supplementary Figure 10: Expression of *INHBE* in obese cynomolgus monkeys

Expression of *INHBE* mRNA in the liver of lean (n=24) and obese (n=13) cynomolgous monkeys was quantified by RT-qPCR. *INHBE* expression for each animal was normalized to the geometric mean of *ARL6IP4* and *RPS9* expression. We then calculated the mean expression level in lean animals and expressed fold-change in *INHBE* relative to this value. Statistical significance was assessed using a two-sided unpaired t-test ( $P = 1 \times 10^{-12}$ ). Error bars represent the standard error of the mean for each group.

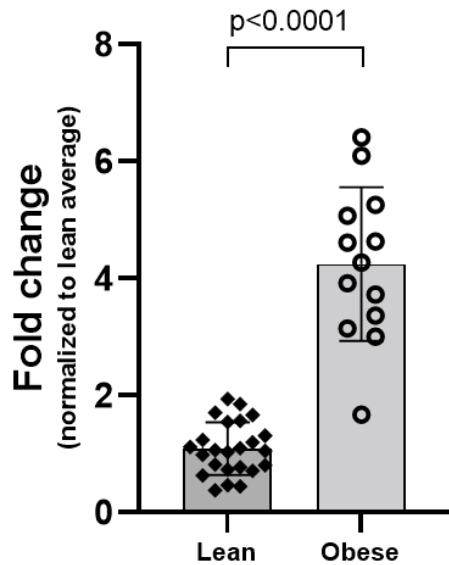

Supplementary Figure 11: WHRadjBMI associations of Mendelian lipodystrophy genes  
Gene-based burden analysis of WHRadjBMI in 362,679 European ancestry individuals was performed using a generalized linear model. For genes implicated in lipodystrophies (according to OMIM <https://omim.org/>), associations with WHRadjBMI are shown for the most significant variant set per gene in the sex combined (All) and sex-stratified analyses. Red lines indicate the threshold for statistical significance ( $P \leq 0.004$ , Bonferroni correcting for 13 genes tested) and Beta=0.

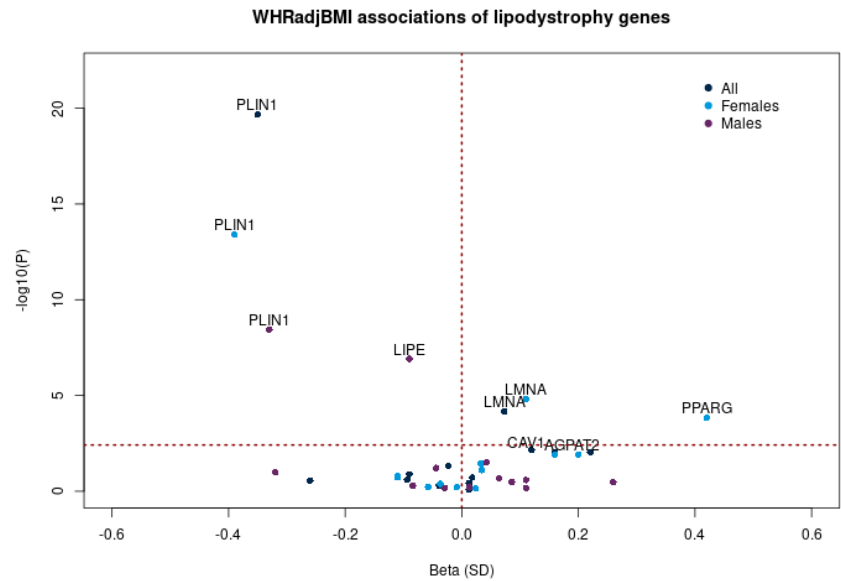

## Supplementary Tables

### Supplementary Table 1: Gene burden analysis conditioning on nearby hits.

For genes within 1Mb of each other that were significant in the gene burden analysis, namely *KEAP1* and *COL5A3*, we performed conditional analysis. Burden analysis of WHRadjBMI was performed using a generalized linear model adjusting for the first 30 PCs of genetic ancestry and the relevant genotype as indicated (“adjustment”). The threshold for significance was  $P \leq 1.05 \times 10^{-6}$  (Bonferroni correcting for the number of genes and variant masks tested).

| Gene          | Variant set   | Gene coordinates (hg38) | adjustment                    | <i>P</i> | Beta (95% CI) in SD units of WHRadjBMI |
|---------------|---------------|-------------------------|-------------------------------|----------|----------------------------------------|
| <i>COL5A3</i> | pLOF          | 19:9959561-10010532     | unadjusted                    | 4.20E-07 | 0.23 (0.14, 0.32)                      |
| <i>COL5A3</i> | pLOF          | 19:9959561-10010532     | <i>KEAP1</i><br>pLOF+missense | 4.03E-07 | 0.23 (0.14, 0.32)                      |
| <i>KEAP1</i>  | pLOF+missense | 19:10486120-10503378    | unadjusted                    | 1.16E-08 | 0.25 (0.16, 0.33)                      |
| <i>KEAP1</i>  | pLOF+missense | 19:10486120-10503378    | <i>COL5A3</i> pLOF            | 1.11E-08 | 0.25 (0.16, 0.33)                      |
| <i>KEAP1</i>  | missense      | 19:10486120-10503378    | unadjusted                    | 2.58E-08 | 0.25 (0.16, 0.34)                      |
| <i>KEAP1</i>  | missense      | 19:10486120-10503378    | <i>COL5A3</i> pLOF            | 2.48E-08 | 0.25 (0.16, 0.34)                      |

Supplementary Table 2: Gene burden analysis conditioning on nearby GWAS hits.

We conditioned genes significant in our burden analysis on the top array association(s) with WHRadjBMI (lead SNP in a 250kb window with  $P \leq 1.05 \times 10^{-6}$ ) in a 1Mb window. Conditional analysis was performed on 363,016 European ancestry individuals with exome and array genotypes available, unadjusted values are from our primary analysis. Burden analysis was performed using a generalized linear model adjusting for the first 30 PCs of genetic ancestry and the relevant genotype as indicated (“adjustment”). The threshold for significance was  $P \leq 1.05 \times 10^{-6}$  (Bonferroni correcting for the number of genes and variant masks tested in our primary analysis).

| Gene          | Variant set   | Adjustment               | P        | Beta (95% CI) in SD units of WHRadjBMI | N carriers | significant |
|---------------|---------------|--------------------------|----------|----------------------------------------|------------|-------------|
| <i>PDE3B</i>  | pLOF          | unadjusted               | 2.17E-17 | -0.26 (-0.32, -0.2)                    | 1020       | Y           |
| <i>PDE3B</i>  | pLOF          | rs1037378 and rs76613195 | 3.91E-16 | -0.25 (-0.32, -0.19)                   | 1017       | Y           |
| <i>PDE3B</i>  | pLOF          | rs76613195               | 3.28E-16 | -0.25 (-0.32, -0.19)                   | 1017       | Y           |
| <i>PDE3B</i>  | pLOF          | rs1037378                | 5.27E-17 | -0.26 (-0.32, -0.20)                   | 1017       | Y           |
| <i>PLIN4</i>  | pLOF          | unadjusted               | 1.84E-09 | 0.13 (0.091, 0.18)                     | 1961       | Y           |
| <i>PLIN4</i>  | pLOF          | rs13041                  | 1.45E-09 | 0.14 (0.092, 0.18)                     | 1958       | Y           |
| <i>PLIN4</i>  | pLOF+missense | unadjusted               | 1.97E-09 | 0.13 (0.09, 0.17)                      | 2199       | Y           |
| <i>PLIN4</i>  | pLOF+missense | rs13041                  | 1.20E-09 | 0.13 (0.087, 0.17)                     | 2194       | Y           |
| <i>INSR</i>   | pLOF          | unadjusted               | 1.05E-07 | -0.45 (-0.62, -0.29)                   | 135        | Y           |
| <i>INSR</i>   | pLOF          | rs199817986              | 1.05E-07 | -0.45 (-0.62, -0.29)                   | 135        | Y           |
| <i>ACVR1C</i> | missense      | unadjusted               | 6.24E-10 | -0.14 (-0.19, -0.097)                  | 1892       | Y           |
| <i>ACVR1C</i> | missense      | rs55920843               | 6.64E-10 | -0.14 (-0.19, -0.096)                  | 1888       | Y           |
| <i>ACVR1C</i> | pLOF+missense | unadjusted               | 7.10E-10 | -0.14 (-0.18, -0.095)                  | 1923       | Y           |
| <i>ACVR1C</i> | pLOF+missense | rs55920843               | 7.66E-10 | -0.14 (-0.18, -0.095)                  | 1919       | Y           |
| <i>SLC5A3</i> | missense      | unadjusted               | 1.93E-08 | 0.072 (0.047, 0.097)                   | 6141       | Y           |
| <i>SLC5A3</i> | missense      | rs28451064               | 1.76E-08 | 0.072 (0.047, 0.097)                   | 6123       | Y           |
| <i>TRIM40</i> | pLOF+missense | unadjusted               | 6.99E-07 | 0.074 (0.045, 0.10)                    | 4443       | Y           |
| <i>TRIM40</i> | pLOF+missense | rs3094625                | 2.55E-06 | 0.07 (0.041, 0.1)                      | 4433       | N           |

Supplementary Table 3: WHRadjBMI associations in men

Results for any variant set significant in the male-specific, female-specific or sex-combined analysis are shown. Burden analysis was performed using a generalized linear model adjusting for the first 30 PCs of genetic ancestry. The threshold for significance was  $P \leq 1.05 \times 10^{-6}$  (Bonferroni correcting for the number of genes and variant masks tested). N = 166,533 men with WHRadjBMI measurements.

| Gene           | Variant set   | Gene coordinates      | P        | Beta (95% CI) in SD units of WHRadjBMI | N (carriers   non-carriers) | significant |
|----------------|---------------|-----------------------|----------|----------------------------------------|-----------------------------|-------------|
| <i>PLIN1</i>   | pLOF          | 15:89664365-89679417  | 3.55E-09 | -0.33 (-0.44, -0.22)                   | 316   166217                | Y           |
| <i>LIPE</i>    | pLOF+missense | 19:42401507-42427426  | 1.21E-07 | -0.09 (-0.12, -0.057)                  | 3498   163035               | Y           |
| <i>LIPE</i>    | missense      | 19:42401507-42427426  | 1.42E-07 | -0.091 (-0.13, -0.057)                 | 3342   163191               | Y           |
| <i>GIGYF1</i>  | pLOF          | 7:100679506-100694280 | 6.76E-07 | 0.57 (0.34, 0.79)                      | 76   166457                 | Y           |
| <i>PYGM</i>    | pLOF          | 11:64746389-64760715  | 4.3E-06  | 0.12 (0.068, 0.17)                     | 1502   165031               | N           |
| <i>ANKRD12</i> | pLOF          | 18:9136753-9285985    | 1.28E-05 | 0.38 (0.21, 0.55)                      | 131   166402                | N           |
| <i>SLC5A3</i>  | missense      | 21:34073523-34106262  | 4.51E-05 | 0.077 (0.04, 0.11)                     | 2803   163730               | N           |
| <i>PLIN1</i>   | pLOF+missense | 15:89664365-89679417  | 5.53E-05 | -0.087 (-0.13, -0.045)                 | 2140   164393               | N           |
| <i>INHBE</i>   | pLOF          | 12:57455291-57458013  | 3.87E-04 | -0.21 (-0.33, -0.095)                  | 277   166256                | N           |
| <i>INHBE</i>   | pLOF+missense | 12:57455291-57458013  | 0.001    | -0.16 (-0.25, -0.062)                  | 410   166123                | N           |
| <i>ACVR1C</i>  | missense      | 2:157526767-157628887 | 0.003    | -0.1 (-0.17, -0.033)                   | 857   165676                | N           |
| <i>ACVR1C</i>  | pLOF+missense | 2:157526767-157628887 | 0.005    | -0.096 (-0.16, -0.03)                  | 871   165662                | N           |
| <i>KEAP1</i>   | pLOF+missense | 19:10486120-10503378  | 0.02     | 0.15 (0.021, 0.29)                     | 212   166321                | N           |
| <i>KEAP1</i>   | missense      | 19:10486120-10503378  | 0.03     | 0.15 (0.013, 0.29)                     | 196   166337                | N           |
| <i>TRIM40</i>  | pLOF+missense | 6:30135998-30148773   | 0.04     | 0.047 (0.0031, 0.09)                   | 2029   164504               | N           |
| <i>SLC35F5</i> | pLOF+missense | 2:113702677-113756823 | 0.14     | 0.029 (-0.0095, 0.068)                 | 2589   163944               | N           |
| <i>SLC35F5</i> | missense      | 2:113702677-113756823 | 0.14     | 0.03 (-0.01, 0.07)                     | 2389   164144               | N           |
| <i>COL5A3</i>  | pLOF          | 19:9959561-10010532   | 0.17     | 0.093 (-0.039, 0.22)                   | 220   166313                | N           |
| <i>PDE3B</i>   | pLOF          | 11:14643691-14874139  | 0.18     | -0.062 (-0.15, 0.028)                  | 464   166069                | N           |



|              |               |                       |      |                        |             |   |
|--------------|---------------|-----------------------|------|------------------------|-------------|---|
| <i>PLIN4</i> | pLOF+missense | 19:4502180-4520285    | 0.38 | 0.028 (-0.034, 0.089)  | 1001 165532 | N |
| <i>ABCA1</i> | missense      | 9:104781002-104928246 | 0.50 | -0.011 (-0.044, 0.021) | 3603 162930 | N |
| <i>ABCA1</i> | pLOF+missense | 9:104781002-104928246 | 0.50 | -0.011 (-0.043, 0.021) | 3804 162729 | N |
| <i>PLIN4</i> | pLOF          | 19:4502180-4520285    | 0.61 | 0.017 (-0.048, 0.083)  | 888 165645  | N |
| <i>INSR</i>  | pLOF+missense | 19:7112255-7294405    | 0.61 | -0.019 (-0.095, 0.056) | 663 165870  | N |
| <i>INSR</i>  | pLOF          | 19:7112255-7294405    | 0.67 | 0.052 (-0.19, 0.29)    | 66 166467   | N |

Supplementary Table 4: WHRadjBMI associations in women

Results for any variants set significant in the male-specific, female-specific or sex-combined analysis are shown. Burden analysis was performed using a generalized linear model adjusting for the first 30 PCs of genetic ancestry. The threshold for significance was  $P \leq 1.05 \times 10^{-6}$  (Bonferroni correcting for the number of genes and variant masks tested). N = 195,777 women with WHRadjBMI measurements.

| Gene           | Variant set   | Gene coordinates      | P        | Beta (95% CI) in SD units of WHRadjBMI | N (carriers   non-carriers) | significant |
|----------------|---------------|-----------------------|----------|----------------------------------------|-----------------------------|-------------|
| <i>PDE3B</i>   | pLOF          | 11:14643691-14874139  | 6.31E-23 | -0.42 (-0.5, -0.33)                    | 555   195222                | Y           |
| <i>PLIN1</i>   | pLOF          | 15:89664365-89679417  | 3.94E-14 | -0.39 (-0.49, -0.29)                   | 365   195412                | Y           |
| <i>INSR</i>    | pLOF          | 19:7112255-7294405    | 1.48E-13 | -0.88 (-1.1, -0.65)                    | 69   195708                 | Y           |
| <i>PLIN4</i>   | pLOF          | 19:4502180-4520285    | 1.68E-12 | 0.21 (0.16, 0.27)                      | 1070   194707               | Y           |
| <i>PLIN4</i>   | pLOF+missense | 19:4502180-4520285    | 1.19E-11 | 0.2 (0.14, 0.25)                       | 1195   194582               | Y           |
| <i>PLIN1</i>   | pLOF+missense | 15:89664365-89679417  | 1.29E-11 | -0.13 (-0.17, -0.095)                  | 2579   193198               | Y           |
| <i>ACVR1C</i>  | pLOF+missense | 2:157526767-157628887 | 2.25E-08 | -0.17 (-0.23, -0.11)                   | 1052   194725               | Y           |
| <i>ACVR1C</i>  | missense      | 2:157526767-157628887 | 2.88E-08 | -0.17 (-0.23, -0.11)                   | 1035   194742               | Y           |
| <i>ABCA1</i>   | pLOF+missense | 9:104781002-104928246 | 4.24E-08 | -0.082 (-0.11, -0.053)                 | 4511   191266               | Y           |
| <i>INSR</i>    | pLOF+missense | 19:7112255-7294405    | 4.56E-08 | -0.2 (-0.27, -0.13)                    | 773   195004                | Y           |
| <i>COL5A3</i>  | pLOF          | 19:9959561-10010532   | 8.73E-08 | 0.33 (0.21, 0.45)                      | 259   195518                | Y           |
| <i>SLC35F5</i> | missense      | 2:113702677-113756823 | 1.78E-07 | -0.095 (-0.13, -0.06)                  | 3002   192775               | Y           |
| <i>KEAP1</i>   | pLOF+missense | 19:10486120-10503378  | 3.41E-07 | 0.29 (0.18, 0.4)                       | 307   195470                | Y           |
| <i>SLC35F5</i> | pLOF+missense | 2:113702677-113756823 | 3.98E-07 | -0.089 (-0.12, -0.055)                 | 3256   192521               | Y           |
| <i>KEAP1</i>   | missense      | 19:10486120-10503378  | 5.40E-07 | 0.3 (0.18, 0.41)                       | 280   195497                | Y           |
| <i>ABCA1</i>   | missense      | 9:104781002-104928246 | 5.93E-07 | -0.077 (-0.11, -0.046)                 | 4289   191488               | Y           |
| <i>INHBE</i>   | pLOF+missense | 12:57455291-57458013  | 2.19E-06 | -0.21 (-0.3, -0.12)                    | 503   195274                | N           |
| <i>TRIM40</i>  | pLOF+missense | 6:30135998-30148773   | 5.49E-06 | 0.092 (0.053, 0.13)                    | 2409   193368               | N           |
| <i>INHBE</i>   | pLOF          | 12:57455291-57458013  | 3.06E-05 | -0.22 (-0.33, -0.12)                   | 340   195437                | N           |

|                |               |                       |          |                        |             |   |
|----------------|---------------|-----------------------|----------|------------------------|-------------|---|
| <i>SLC5A3</i>  | missense      | 21:34073523-34106262  | 5.83E-05 | 0.07 (0.036, 0.10)     | 3331 192446 | N |
| <i>PYGM</i>    | pLOF          | 11:64746389-64760715  | 4.57E-04 | 0.081 (0.036, 0.13)    | 1857 193920 | N |
| <i>ANKRD12</i> | pLOF          | 18:9136753-9285985    | 0.002    | 0.27 (0.1, 0.44)       | 130 195647  | N |
| <i>LIPE</i>    | pLOF+missense | 19:42401507-42427426  | 0.04     | 0.033 (0.0023, 0.064)  | 4084 191693 | N |
| <i>LIPE</i>    | missense      | 19:42401507-42427426  | 0.09     | 0.027 (-0.0041, 0.059) | 3895 191882 | N |
| <i>GIGYF1</i>  | pLOF          | 7:100679506-100694280 | 0.78     | -0.037 (-0.3, 0.23)    | 54 195723   | N |

Supplementary Table 5: Meta-analysis of WHRadjBMI in men and women

Gene burden results from sex-stratified analysis of WHRadjBMI were meta-analyzed using an inverse-variance weighted method implemented in METAL. Results for any variant set significant in the male-specific, female-specific or sex-combined analysis are shown.  $P_{het}$ ; heterogeneity P-value from Cochran's Q test ( $P \leq 0.05$  suggests evidence of heterogeneity).

| Gene           | Variant set   | P        | Beta (95% CI) in SD units of WHRadjBMI | Direction | $P_{het}$ | sig | het |
|----------------|---------------|----------|----------------------------------------|-----------|-----------|-----|-----|
| <i>PLIN1</i>   | pLOF          | 1.18E-21 | -0.36 (-0.44, -0.29)                   | --        | 0.41      | Y   | N   |
| <i>PDE3B</i>   | pLOF          | 2.61E-16 | -0.26 (-0.32, -0.19)                   | --        | 1.58E-08  | Y   | Y   |
| <i>PLIN1</i>   | pLOF+missense | 1.15E-14 | -0.11 (-0.14, -0.084)                  | --        | 0.12      | Y   | N   |
| <i>ACVR1C</i>  | missense      | 1.21E-09 | -0.14 (-0.18, -0.094)                  | --        | 0.12      | Y   | N   |
| <i>ACVR1C</i>  | pLOF+missense | 1.49E-09 | -0.14 (-0.18, -0.093)                  | --        | 0.10      | Y   | N   |
| <i>SLC5A3</i>  | missense      | 1.06E-08 | 0.073 (0.048, 0.098)                   | ++        | 0.77      | Y   | N   |
| <i>PYGM</i>    | pLOF          | 1.35E-08 | 0.098 (0.064, 0.13)                    | ++        | 0.28      | Y   | N   |
| <i>INHBE</i>   | pLOF+missense | 1.36E-08 | -0.19 (-0.25, -0.12)                   | --        | 0.44      | Y   | N   |
| <i>PLIN4</i>   | pLOF+missense | 2.19E-08 | 0.12 (0.077, 0.16)                     | ++        | 8.53E-05  | Y   | Y   |
| <i>PLIN4</i>   | pLOF          | 2.62E-08 | 0.13 (0.081, 0.17)                     | ++        | 1.22E-05  | Y   | Y   |
| <i>INHBE</i>   | pLOF          | 4.44E-08 | -0.22 (-0.30, -0.14)                   | --        | 0.88      | Y   | N   |
| <i>KEAP1</i>   | pLOF+missense | 7.95E-08 | 0.23 (0.15, 0.32)                      | ++        | 0.13      | Y   | N   |
| <i>ANKRD12</i> | pLOF          | 1.27E-07 | 0.32 (0.2, 0.45)                       | ++        | 0.38      | Y   | N   |
| <i>KEAP1</i>   | missense      | 1.77E-07 | 0.24 (0.15, 0.33)                      | ++        | 0.12      | Y   | N   |
| <i>INSR</i>    | pLOF          | 6.12E-07 | -0.43 (-0.59, -0.26)                   | +-        | 4.5E-08   | Y   | Y   |
| <i>COL5A3</i>  | pLOF          | 1.1E-06  | 0.22 (0.13, 0.31)                      | ++        | 0.009     | N   | Y   |
| <i>TRIM40</i>  | pLOF+missense | 1.84E-06 | 0.072 (0.042, 0.1)                     | ++        | 0.13      | N   | N   |
| <i>ABCA1</i>   | pLOF+missense | 7.00E-06 | -0.05 (-0.071, -0.028)                 | --        | 0.001     | N   | Y   |
| <i>INSR</i>    | pLOF+missense | 1.32E-05 | -0.11 (-0.17, -0.063)                  | --        | 8.29E-04  | N   | Y   |
| <i>ABCA1</i>   | missense      | 3.45E-05 | -0.047 (-0.069, -0.025)                | --        | 0.004     | N   | Y   |
| <i>GIGYF1</i>  | pLOF          | 2.96E-04 | 0.32 (0.14, 0.49)                      | +-        | 6.38E-04  | N   | Y   |
| <i>SLC35F5</i> | missense      | 0.003    | -0.04 (-0.066, -0.013)                 | +-        | 4.93E-06  | N   | Y   |
| <i>SLC35F5</i> | pLOF+missense | 0.005    | -0.037 (-0.062, -0.011)                | +-        | 7.6E-06   | N   | Y   |
| <i>LIPE</i>    | missense      | 0.02     | -0.027 (-0.051, -0.0043)               | +-        | 5.17E-07  | N   | Y   |
| <i>LIPE</i>    | pLOF+missense | 0.04     | -0.024 (-0.046, -0.0011)               | +-        | 1.07E-07  | N   | Y   |

Supplementary Table 6: Replication of gene-level associations in AMP-T2D-GENES

Gene-based analysis of WHRadjBMI was performed using a burden test with linear regression in up to 27,380 unrelated individuals. The analysis used 10 PCs of genetic ancestry, sample cohort subgroup, and sequencing technology as covariates. The threshold for statistical significance adjusting for 10 genes tested is  $P \leq 0.005$  with  $P \leq 0.05$  indicating nominal significance.

| Gene          | Variant set   | P                     | Beta (95% CI)          | N     | N carriers |
|---------------|---------------|-----------------------|------------------------|-------|------------|
| <i>INHBE</i>  | pLOF          | 9.41x10 <sup>-4</sup> | -1.03 (-1.60, -0.42)   | 13456 | 10         |
| <i>INHBE</i>  | pLOF+missense | 0.04                  | -0.31 (-0.61, -0.0076) | 20052 | 41         |
| <i>PLIN1</i>  | pLOF+missense | 0.05                  | -0.13 (-0.27, 0.002)   | 25380 | 204        |
| <i>PLIN4</i>  | pLOF          | 0.11                  | 0.15 (-0.032, 0.32)    | 25761 | 121        |
| <i>PLIN1</i>  | pLOF          | 0.17                  | -0.26 (-0.64, 0.12)    | 19549 | 26         |
| <i>PDE3B</i>  | pLOF          | 0.18                  | -0.32 (-0.78, 0.14)    | 13270 | 17         |
| <i>KEAP1</i>  | missense      | 0.20                  | 0.28 (-0.14, 0.70)     | 19995 | 21         |
| <i>KEAP1</i>  | pLOF+missense | 0.20                  | 0.263 (-0.14, 0.66)    | 19995 | 23         |
| <i>INSR</i>   | pLOF          | 0.29                  | -0.33 (-0.95, 0.29)    | 6269  | 10         |
| <i>SLC5A3</i> | missense      | 0.42                  | 0.19 (-0.27, 0.66)     | 16430 | 17         |
| <i>ACVR1C</i> | missense      | 0.50                  | 0.08 (-0.15, 0.31)     | 25154 | 70         |
| <i>ACVR1C</i> | pLOF+missense | 0.50                  | 0.08 (-0.15, 0.31)     | 25154 | 70         |
| <i>PLIN4</i>  | pLOF+missense | 0.55                  | 0.03 (-0.07, 0.13)     | 25761 | 401        |
| <i>COL5A3</i> | pLOF          | 0.76                  | 0.06 (-0.30, 0.41)     | 21776 | 29         |
| <i>PYGM</i>   | pLOF          | 0.85                  | 0.02 (-0.21, 0.26)     | 24037 | 67         |

Supplementary Table 7: Sensitivity analysis in White outgroup of UKB

Association results for genes significant in the discovery analysis with  $\geq 5$  rare variant carriers in the White outgroup. Burden analysis of WHRadjBMI was performed using a generalized linear model. The direction of effect in the sensitivity analysis and discovery analysis respectively is shown as well as meta-analysis of these results. The threshold for statistical significance adjusting for 11 genes tested is  $P \leq 0.003$  with  $P \leq 0.05$  indicating nominal significance

| Gene          | Variant set   | <i>P</i> | Beta (95% CI)            | N carrier | Significance<br>** $P \leq 0.05$<br>* $P \leq 0.003$ | Direction | <i>P</i> meta | Beta meta (95% CI)       |
|---------------|---------------|----------|--------------------------|-----------|------------------------------------------------------|-----------|---------------|--------------------------|
| <i>PLIN1</i>  | pLOF          | 2.38E-04 | -0.48<br>(-0.73, -0.22)  | 59        | **                                                   | --        | 3.57E-23      | -0.36<br>(-0.43, -0.29)  |
| <i>PLIN1</i>  | pLOF+missense | 0.16     | -0.061<br>(-0.14, 0.023) | 560       |                                                      | --        | 3.16E-14      | -0.10<br>(-0.13, -0.077) |
| <i>PLIN4</i>  | pLOF          | 0.006    | 0.23<br>(0.067, 0.39)    | 149       | *                                                    | ++        | 6.6E-11       | 0.14<br>(0.01, 0.18)     |
| <i>PLIN4</i>  | pLOF+missense | 0.002    | 0.24<br>(0.086, 0.38)    | 173       | **                                                   | ++        | 3.93E-11      | 0.14<br>(0.095, 0.17)    |
| <i>INSR</i>   | pLOF          | 0.007    | -0.96<br>(-1.6, -0.26)   | 8         | *                                                    | --        | 6.44E-09      | -0.48<br>(-0.64, -0.32)  |
| <i>INHBE</i>  | pLOF          | 0.44     | -0.13<br>(-0.44, 0.19)   | 38        |                                                      | --        | 4.24E-08      | -0.21<br>(-0.29, -0.14)  |
| <i>INHBE</i>  | pLOF+missense | 0.64     | -0.063<br>(-0.33, 0.2)   | 54        |                                                      | --        | 2.65E-08      | -0.18<br>(-0.24, -0.11)  |
| <i>ACVR1C</i> | missense      | 0.58     | -0.052<br>(-0.24, 0.13)  | 114       |                                                      | --        | 8.3E-10       | -0.14<br>(-0.18, -0.093) |
| <i>ACVR1C</i> | pLOF+missense | 0.57     | -0.052<br>(-0.23, 0.13)  | 118       |                                                      | --        | 9.26E-10      | -0.13<br>(-0.18, -0.092) |
| <i>COL5A3</i> | pLOF          | 0.40     | 0.16<br>(-0.21, 0.54)    | 27        |                                                      | ++        | 3.07E-07      | 0.23<br>(0.14, 0.31)     |
| <i>KEAP1</i>  | missense      | 4.30E-04 | 0.40<br>(0.18, 0.62)     | 79        | **                                                   | ++        | 9.18E-11      | 0.27<br>(0.19, 0.36)     |
| <i>KEAP1</i>  | pLOF+missense | 4.99E-04 | 0.38<br>(0.16, 0.59)     | 86        | **                                                   | ++        | 4.31E-11      | 0.27<br>(0.19, 0.35)     |
| <i>PDE3B</i>  | pLOF          | 0.15     | -0.16<br>(-0.38, 0.06)   | 78        |                                                      | --        | 1.12E-17      | -0.26<br>(-0.32, -0.20)  |
| <i>PYGM</i>   | pLOF          | 0.66     | -0.029<br>(-0.16, 0.1)   | 220       |                                                      | +-        | 3.78E-07      | 0.085<br>(0.052, 0.12)   |
| <i>SLC5A3</i> | missense      | 0.11     | 0.064<br>(-0.013, 0.14)  | 662       |                                                      | ++        | 5.09E-09      | 0.071<br>(0.047, 0.095)  |

Supplementary Table 8: *INHBE* pLOF leave-one-variant-out analysis in UKB

We performed leave-one-variant-out analysis for *INHBE* pLOF variants in UKB. Gene-based burden analysis of WHRadjBMI was performed using a generalized linear model excluding one variant at a time from the analysis. Single variant analysis was performed using a linear model.

| Variant set                        | P burden | Beta burden (95% CI) | N carrier burden | rsid        | consequence             | HGVS annotation               | MAF     | P single variant | Beta single variant (95% CI) |
|------------------------------------|----------|----------------------|------------------|-------------|-------------------------|-------------------------------|---------|------------------|------------------------------|
| <i>INHBE</i> pLOF all variants     | 4.98E-08 | -0.22 (-0.3, -0.14)  | 618              |             |                         |                               |         |                  |                              |
| <i>INHBE</i> pLOF 12:57456093:G:C  | 0.34     | -0.10 (-0.32, 0.11)  | 80               | rs150777893 | splice acceptor variant | NM_031479.4: c.299-1G>C       | 0.074%  | 4.31E-08         | -0.23 (-0.32, -0.15)         |
| <i>INHBE</i> pLOF 12:57455835:G:T  | 2.44E-07 | -0.21 (-0.3, -0.13)  | 569              | rs375342858 | splice donor variant    | NM_031479.4: c.298+1G>T       | 0.007%  | 0.08             | -0.25 (-0.53, 0.03)          |
| <i>INHBE</i> pLOF 12:57455654:C:T  | 3.19E-08 | -0.22 (-0.3, -0.14)  | 604              | ""          | stop gained             | NP_113667.1: p.Arg40Ter       | 0.002%  | 0.92             | 0.03 (-0.49, 0.55)           |
| <i>INHBE</i> pLOF 12:57455698:GT:G | 1.49E-08 | -0.23 (-0.31, -0.15) | 611              | ""          | frameshift variant      | NP_113667.1: p.Leu55CysfsTer3 | 0.001%  |                  |                              |
| <i>INHBE</i> pLOF 12:57455588:C:T  | 8.50E-08 | -0.21 (-0.29, -0.14) | 614              | rs750332159 | stop gained             | NP_113667.1: p.Arg18Ter       | 0.0005% |                  |                              |
| <i>INHBE</i> pLOF 12:57455553:TC:T | 4.49E-08 | -0.22 (-0.3, -0.14)  | 616              | ""          | frameshift variant      | NP_113667.1: p.Gln7SerfsTer40 | 0.0003% |                  |                              |
| <i>INHBE</i> pLOF 12:57455645:C:T  | 3.82E-08 | -0.22 (-0.3, -0.14)  | 616              | ""          | stop gained             | NP_113667.1: p.Gln37Ter       | 0.0003% |                  |                              |
| <i>INHBE</i> pLOF 12:57455742:A:G  | 4.01E-08 | -0.22 (-0.3, -0.14)  | 616              | ""          | splice acceptor variant | NP_113667.1: p.Gln69Arg       | 0.0003% |                  |                              |

Supplementary Table 9: *INHBE* pLOF leave-one-variant-out analysis in AMP-T2D-GENES

We performed leave-one-variant-out analysis for *INHBE* pLOF in AMP-T2D-GENES. Analysis was performed using a burden test with linear regression excluding one variant at a time from the analysis.

| Variant set                                 | P        | Beta in SD (95% CI)  | N     | N carrier | rsid        | consequence             |
|---------------------------------------------|----------|----------------------|-------|-----------|-------------|-------------------------|
| <i>INHBE</i> pLOF all variants              | 9.41E-04 | -1.03 (-1.64, -0.42) | 13456 | 10        |             |                         |
| <i>INHBE</i> pLOF exclude 12:57850337 C/T,A | 0.03     | -0.77 (-1.45, -0.09) | 12550 | 8         | rs146517777 | stop gain (Tyr253Ter)   |
| <i>INHBE</i> pLOF exclude 12:57849876 G/C   | 0.008    | -1.16 (-2.01, -0.31) | 7100  | 5         | rs150777893 | splice acceptor variant |
| <i>INHBE</i> pLOF exclude 12:57849618 G/T   | 1.18E-04 | -1.26 (-1.90, -0.62) | 13456 | 9         | rs375342858 | splice donor variant    |
| <i>INHBE</i> pLOF exclude 12:57850164 G/T   | 0.006    | -0.95 (-1.63, -0.27) | 11813 | 8         | rs764817559 | stop gain (Glu196Ter)   |

Supplementary Table 10: Association of WHRadjBMI genes with unadjusted WHR and BMI.

For genes associated with WHRadjBMI, the effects on WHR (without BMI adjustment) and BMI are shown. Analysis was performed using a generalized linear model adjusting for age, sex, and the first 30 PCs of genetic ancestry. Whether variant sets are significant correcting for the number of variant sets and phenotypes tested is indicated ( $P < 0.0016$ ).

| <b>Title</b> | <b>Variant set</b>          | <b>P</b> | <b>Beta in SD (95% CI)</b> | <b>significant</b> |
|--------------|-----------------------------|----------|----------------------------|--------------------|
| WHR          | <i>ACVR1C</i> missense      | 1.24E-05 | -0.076 (-0.11, -0.042)     | Y                  |
| BMI          | <i>ACVR1C</i> missense      | 0.16     | 0.031 (-0.013, 0.076)      | N                  |
| WHR          | <i>ACVR1C</i> pLOF+missense | 2.77E-05 | -0.072 (-0.11, -0.038)     | Y                  |
| BMI          | <i>ACVR1C</i> pLOF+missense | 0.09     | 0.038 (-0.0056, 0.082)     | N                  |
| WHR          | <i>ANKRD12</i> pLOF         | 3.15E-09 | 0.27 (0.18, 0.37)          | Y                  |
| BMI          | <i>ANKRD12</i> pLOF         | 0.005    | 0.17 (0.052, 0.29)         | N                  |
| WHR          | <i>COL5A3</i> pLOF          | 2.26E-06 | 0.16 (0.095, 0.23)         | Y                  |
| BMI          | <i>COL5A3</i> pLOF          | 0.57     | 0.025 (-0.063, 0.11)       | N                  |
| WHR          | <i>INHBE</i> pLOF           | 3.57E-05 | -0.12 (-0.18, -0.066)      | Y                  |
| BMI          | <i>INHBE</i> pLOF           | 0.77     | 0.011 (-0.066, 0.089)      | N                  |
| WHR          | <i>INHBE</i> pLOF+missense  | 2.95E-04 | -0.09 (-0.14, -0.041)      | Y                  |
| BMI          | <i>INHBE</i> pLOF+missense  | 0.13     | 0.049 (-0.015, 0.11)       | N                  |
| WHR          | <i>INSR</i> pLOF            | 8.53E-07 | -0.32 (-0.45, -0.19)       | Y                  |
| BMI          | <i>INSR</i> pLOF            | 0.64     | 0.039 (-0.13, 0.2)         | N                  |
| WHR          | <i>KEAP1</i> missense       | 7.31E-06 | 0.15 (0.087, 0.22)         | Y                  |
| BMI          | <i>KEAP1</i> missense       | 0.69     | -0.018 (-0.11, 0.07)       | N                  |
| WHR          | <i>KEAP1</i> pLOF+missense  | 1.01E-05 | 0.14 (0.08, 0.21)          | Y                  |
| BMI          | <i>KEAP1</i> pLOF+missense  | 0.59     | -0.023 (-0.11, 0.061)      | N                  |
| WHR          | <i>PDE3B</i> pLOF           | 3.36E-07 | -0.12 (-0.17, -0.074)      | Y                  |
| BMI          | <i>PDE3B</i> pLOF           | 1.41E-04 | 0.12 (0.057, 0.18)         | Y                  |
| WHR          | <i>PLIN1</i> pLOF           | 1.07E-11 | -0.2 (-0.25, -0.14)        | Y                  |
| BMI          | <i>PLIN1</i> pLOF           | 0.08     | 0.066 (-0.0079, 0.14)      | N                  |
| WHR          | <i>PLIN1</i> pLOF+missense  | 2.07E-05 | -0.046 (-0.068, -0.025)    | Y                  |
| BMI          | <i>PLIN1</i> pLOF+missense  | 1.67E-04 | 0.054 (0.026, 0.082)       | Y                  |
| WHR          | <i>PLIN4</i> pLOF           | 2.06E-04 | 0.063 (0.03, 0.096)        | Y                  |
| BMI          | <i>PLIN4</i> pLOF           | 0.010    | -0.057 (-0.1, -0.014)      | N                  |
| WHR          | <i>PLIN4</i> pLOF+missense  | 1.99E-04 | 0.059 (0.028, 0.091)       | Y                  |
| BMI          | <i>PLIN4</i> pLOF+missense  | 0.008    | -0.055 (-0.096, -0.014)    | N                  |
| WHR          | <i>PYGM</i> pLOF            | 3.88E-05 | 0.053 (0.028, 0.079)       | Y                  |
| BMI          | <i>PYGM</i> pLOF            | 0.61     | -0.0086 (-0.042, 0.025)    | N                  |
| WHR          | <i>SLC5A3</i> missense      | 7.39E-09 | 0.055 (0.037, 0.074)       | Y                  |
| BMI          | <i>SLC5A3</i> missense      | 0.02     | 0.029 (0.0048, 0.054)      | N                  |



Supplementary Table 11: Association of WHRadjBMI genes with metabolic syndrome score

The association of WHRadjBMI-associated genes with MetS score was tested using ordinal regression adjusting for age, sex, and the first 30 PCs of genetic ancestry. The p-value and beta from the ordinal regression are shown as well as the change in MetS score expressed in terms of number of MetS traits.

| Title      | Variant set                 | P        | Beta from ordinal regression (95% CI) | Change in MetS score (95% CI) | N carrier measured |
|------------|-----------------------------|----------|---------------------------------------|-------------------------------|--------------------|
| MetS score | <i>PLIN1</i> pLOF           | 1.36E-08 | -0.44 (-0.59, -0.29)                  | -0.31 (-0.41, -0.21)          | 537                |
| MetS score | <i>PLIN1</i> pLOF+missense  | 9.69E-04 | -0.097 (-0.15, -0.039)                | -0.074 (-0.11, -0.036)        | 3691               |
| MetS score | <i>PDE3B</i> pLOF           | 5.82E-08 | -0.34 (-0.47, -0.22)                  | -0.22 (-0.3, -0.14)           | 811                |
| MetS score | <i>ACVR1C</i> missense      | 0.004    | -0.14 (-0.23, -0.046)                 | -0.085 (-0.15, -0.024)        | 1448               |
| MetS score | <i>ACVR1C</i> pLOF+missense | 0.006    | -0.13 (-0.22, -0.036)                 | -0.08 (-0.14, -0.019)         | 1468               |
| MetS score | <i>INHBE</i> pLOF           | 0.02     | -0.19 (-0.35, -0.03)                  | -0.12 (-0.23, -0.016)         | 483                |
| MetS score | <i>INHBE</i> pLOF+missense  | 0.04     | -0.14 (-0.27, -0.0078)                | -0.08 (-0.17, 0.0057)         | 727                |
| MetS score | <i>PYGM</i> pLOF            | 0.006    | 0.097 (0.028, 0.17)                   | 0.067 (0.021, 0.11)           | 2577               |
| MetS score | <i>ANKRD12</i> pLOF         | 0.03     | 0.28 (0.033, 0.53)                    | 0.2 (0.045, 0.36)             | 215                |
| MetS score | <i>INSR</i> pLOF            | 0.04     | -0.35 (-0.68, -0.013)                 | -0.22 (-0.44, -0.0011)        | 112                |
| MetS score | <i>KEAP1</i> pLOF+missense  | 0.22     | 0.11 (-0.065, 0.29)                   | 0.08 (-0.034, 0.19)           | 409                |
| MetS score | <i>KEAP1</i> missense       | 0.25     | 0.11 (-0.075, 0.29)                   | 0.085 (-0.034, 0.2)           | 380                |
| MetS score | <i>COL5A3</i> pLOF          | 0.37     | 0.083 (-0.098, 0.26)                  | 0.06 (-0.06, 0.18)            | 378                |
| MetS score | <i>PLIN4</i> pLOF           | 0.45     | 0.035 (-0.055, 0.12)                  | 0.015 (-0.044, 0.075)         | 1518               |
| MetS score | <i>PLIN4</i> pLOF+missense  | 0.46     | 0.032 (-0.053, 0.12)                  | 0.015 (-0.041, 0.071)         | 1717               |
| MetS score | <i>SLC5A3</i> missense      | 0.62     | 0.013 (-0.038, 0.064)                 | 0.0079 (-0.026, 0.041)        | 4831               |

Supplementary Table 12: Association of *INHBE* pLOF with metabolic traits

The association of *INHBE* pLOF with various metabolic traits was performed using a generalized linear model adjusting for 30 PCs and other covariates as indicated in the Methods. The effect in standard deviations (SD) and clinical units is shown. VATadjBMI, visceral adipose tissue adjusted for BMI; ASATadjBMI, abdominal subcutaneous adipose tissue adjusted for BMI.

| Title                | P        | Beta in SD (95% CI)    | Beta in clinical units (95% CI) | N carrier measured | Clinical units    |
|----------------------|----------|------------------------|---------------------------------|--------------------|-------------------|
| WHRadjBMI            | 4.98E-08 | -0.22 (-0.3, -0.14)    |                                 | 618                |                   |
| WHR                  | 3.57E-05 | -0.12 (-0.18, -0.07)   | -0.01 (-0.02, -0.006)           | 619                |                   |
| Hip circumference    | 0.37     | 0.035 (-0.04, 0.11)    | 0.33 (-0.39, 1.00)              | 619                | cm                |
| Waist circumference  | 0.08     | -0.06 (-0.13, 0.01)    | -0.82 (-1.8, 0.11)              | 619                | cm                |
| BMI                  | 0.58     | 0.02 (-0.06, 0.10)     | 0.11 (-0.27, 0.48)              | 596                | kg/m <sup>2</sup> |
| Triglycerides        | 9.65E-04 | -0.13 (-0.21, -0.05)   | -0.13 (-0.21, -0.06)            | 594                | mmol/L            |
| HDL cholesterol      | 0.01     | 0.10 (0.02, 0.18)      | 0.04 (0.01, 0.07)               | 550                | mmol/L            |
| LDL cholesterol      | 0.26     | -0.05 (-0.13, 0.03)    | -0.04 (-0.11, 0.03)             | 594                | mmol/L            |
| LDL adj medication   | 0.11     | -0.06 (-0.14, 0.02)    | -0.054 (-0.12, 0.01)            | 594                | mmol/L            |
| ApoB                 | 0.06     | -0.076 (-0.16, 0.004 ) | -0.02 (-0.04, 0.001)            | 593                | g/L               |
| ALT                  | 0.04     | -0.08 (-0.15, -0.004)  | -1.10 (-2.20, -0.06)            | 595                | U/L               |
| HbA1c                | 0.78     | -0.011 (-0.087, 0.065) | -0.074 (-0.59, 0.44)            | 595                | mmol/mol          |
| Glucose              | 0.21     | 0.05 (-0.03, 0.13)     | 0.07 (-0.04, 0.17)              | 551                | mmol/L            |
| Fasting glucose (GP) | 0.03     | -0.17 (-0.33, -0.02)   | -0.37 (-0.70, -0.03)            | 90                 | mmol/L            |
| Diastolic BP         | 0.10     | -0.07 (-0.15, 0.01)    | -0.71 (-1.60, 0.15)             | 574                | mmHg              |
| Systolic BP          | 0.46     | -0.03 (-0.10, 0.05)    | -0.56 (-2.10, 0.94)             | 574                | mmHg              |
| ASATadjBMI           | 0.12     | -0.27 (-0.61, 0.07)    |                                 | 33                 |                   |
| VATadjBMI            | 0.26     | -0.20 (-0.54, 0.14)    |                                 | 33                 |                   |
| Liver fat            | 0.93     | -0.02 (-0.46, 0.42)    | -0.09 (-2.10, 1.90)             | 18                 | %                 |

Supplementary Table 13: Association of *INHBE* pLOF with cardiometabolic disease

The association of *INHBE* pLOF with disease diagnosis was tested using a mixed-effects model with the effect on disease risk from this regression shown as an odds ratio (“OR”). The odds ratio predicted from a Mendelian Randomization study of WHRadjBMI<sup>1</sup> is also shown (“MR-predicted OR”) along with the total number of individuals we would need to sequence to detect a statistically significant effect on disease risk (“N total for *P* = 0.05”).

| Diagnosis                            | <i>P</i> | OR (95% CI)       | N cases   N controls | N carrier cases | MAF   | MR-predicted OR | N total for <i>P</i> = 0.05 |
|--------------------------------------|----------|-------------------|----------------------|-----------------|-------|-----------------|-----------------------------|
| Coronary Heart Disease (phecode 411) | 0.05     | 0.78 (0.60, 1.00) | 48193   350357       | 70              | 0.08% | 0.92            | 7,357,216                   |
| Type 2 diabetes (phecode 250.2)      | 0.65     | 0.94 (0.70, 1.24) | 32383   366167       | 51              | 0.08% | 0.88            | 4,925,516                   |

Supplementary Table 14: Association of rs150777893 with *INHBC* protein levels in an Icelandic plasma proteomic study

The *INHBE* pLOF variant rs150777893 was examined in a recent independent study of plasma proteins performed in the Icelandic population<sup>2</sup>. The association with circulating *INHBC* levels is shown.

| Title                | rsid        | gene         | <i>P</i> | Beta in SD (95% CI) |
|----------------------|-------------|--------------|----------|---------------------|
| <i>INHBC</i> protein | rs150777893 | <i>INHBE</i> | 0.006    | 0.52 (0.15, 0.90)   |

Supplementary Table 15: CNVs deleting *INHBE* in WES and WGS data from UKB

CNVs impacting *INHBE* that are present in the UKB WES data (n=454,756 participants) and/or WGS data (n=150,119 participants). Two of the CNVs identified in the WES data were also identified using the WGS data, with slightly different breakpoints as shown. The start and end positions for these deletions in hg38 coordinates are provided and the genes overlapped are indicated. *INHBE* hg38 coordinates used were 12:57455291-57458013.

| CNV Chr:Start-End (WES)  | CNV Type (WES) | Genes overlapped (WES)                    | CNV Chr:Start-End (WGS)         | CNV Type (WGS) | Genes overlapped (WGS)                    |
|--------------------------|----------------|-------------------------------------------|---------------------------------|----------------|-------------------------------------------|
| 12:57,449,276-57,490,644 | DEL            | <i>INHBE, INHBC, ARHGAP9, GLI1, MARS1</i> | 12:57,438,169-57,495,228        | DEL            | <i>INHBE, INHBC, GLI1, ARHGAP9, MARS1</i> |
| 12:57,449,276-57,456,848 | DEL            | <i>INHBC, INHBE</i>                       | NA (individual has no WGS data) |                |                                           |
| 12:57,418,185-57,456,848 | DEL            | <i>INHBC, INHBE, R3HDM2</i>               | 12:57,414,374-57,458,676        | DEL            | <i>INHBE, INHBC, R3HDM2</i>               |
|                          |                |                                           | 12:57,456,367-57,458,350        | DEL            | <i>INHBE</i>                              |
|                          |                |                                           | 12:57,456,367 - 57,458,350      | DEL            | <i>INHBE</i>                              |

Supplementary Table 16: PheWAS of *ACVR1C* damaging missense variants

Phenome-wide significant associations of *ACVR1C* damaging missense variants ( $P \leq 5 \times 10^{-5}$ ) are shown along with associations with selected cardiometabolic traits and diseases. Association testing was performed using a generalized linear model for quantitative traits and a mixed-effects model for disease diagnoses.

| Title                  | Variant set            | P        | Beta in SD or OR (95% CI) | N carrier measured/<br>N carrier cases | phenome-wide significant |
|------------------------|------------------------|----------|---------------------------|----------------------------------------|--------------------------|
| WHRadjBMI              | <i>ACVR1C</i> missense | 6.24E-10 | -0.14 (-0.19, -0.097)     | 1892                                   | Y                        |
| Birth weight           | <i>ACVR1C</i> missense | 1.92E-23 | 0.30 (0.24, 0.36)         | 1088                                   | Y                        |
| WHR                    | <i>ACVR1C</i> missense | 1.24E-05 | -0.076 (-0.11, -0.042)    | 1894                                   | Y                        |
| Whole body water mass  | <i>ACVR1C</i> missense | 6.96E-04 | 0.048 (0.02, 0.077)       | 1857                                   | N                        |
| BMI                    | <i>ACVR1C</i> missense | 0.17     | 0.031 (-0.013, 0.076)     | 1857                                   | N                        |
| Waist circumference    | <i>ACVR1C</i> missense | 0.67     | -0.009 (-0.048, 0.031)    | 1894                                   | N                        |
| Triglycerides          | <i>ACVR1C</i> missense | 0.06     | -0.043 (-0.088, 0.0014)   | 1795                                   | N                        |
| HDL cholesterol        | <i>ACVR1C</i> missense | 0.08     | 0.039 (-0.005, 0.082)     | 1645                                   | N                        |
| LDL cholesterol        | <i>ACVR1C</i> missense | 0.26     | 0.027 (-0.02, 0.073)      | 1792                                   | N                        |
| ApoB                   | <i>ACVR1C</i> missense | 0.63     | 0.011 (-0.035, 0.058)     | 1791                                   | N                        |
| LDL adj medication     | <i>ACVR1C</i> missense | 0.59     | 0.013 (-0.033, 0.058)     | 1792                                   | N                        |
| ALT                    | <i>ACVR1C</i> missense | 0.67     | -0.009 (-0.053, 0.034)    | 1797                                   | N                        |
| HbA1c                  | <i>ACVR1C</i> missense | 0.06     | -0.042 (-0.086, 0.0011)   | 1806                                   | N                        |
| Diastolic BP           | <i>ACVR1C</i> missense | 0.01     | -0.06 (-0.11, -0.014)     | 1754                                   | N                        |
| Systolic BP            | <i>ACVR1C</i> missense | 0.04     | -0.046 (-0.089, -0.0021)  | 1754                                   | N                        |
| VATadjBMI              | <i>ACVR1C</i> missense | 0.02     | -0.23 (-0.42, -0.04)      | 107                                    | N                        |
| ASATadjBMI             | <i>ACVR1C</i> missense | 0.84     | -0.02 (-0.21, 0.17)       | 107                                    | N                        |
| Type 2 diabetes        | <i>ACVR1C</i> missense | 0.005    | 0.78 (0.66, 0.94)         | 138                                    | N                        |
| Coronary Heart Disease | <i>ACVR1C</i> missense | 0.53     | 1.0 (0.91, 1.2)           | 268                                    | N                        |

Supplementary Table 17: PheWAS of *PLIN1* pLOF

Phenome-wide significant associations of *PLIN1* pLOF variants ( $P \leq 5 \times 10^{-5}$ ) are shown along with associations with selected cardiometabolic traits and diseases. Association testing was performed using a generalized linear model for quantitative traits and a mixed-effects model for disease diagnoses.

| Title                       | Variant set       | P        | Beta in SD or OR (95% CI) | N carrier measured/N carrier cases | Phenome-wide significant |
|-----------------------------|-------------------|----------|---------------------------|------------------------------------|--------------------------|
| WHRadjBMI                   | <i>PLIN1</i> pLOF | 2.12E-20 | -0.35 (-0.43, -0.28)      | 681                                | Y                        |
| HDL cholesterol             | <i>PLIN1</i> pLOF | 3.29E-20 | 0.34 (0.27, 0.41)         | 601                                | Y                        |
| ApoA                        | <i>PLIN1</i> pLOF | 4.71E-13 | 0.27 (0.20, 0.34)         | 594                                | Y                        |
| Triglycerides               | <i>PLIN1</i> pLOF | 9.56E-12 | -0.26 (-0.33, -0.18)      | 651                                | Y                        |
| WHR                         | <i>PLIN1</i> pLOF | 1.07E-11 | -0.2 (-0.25, -0.14)       | 682                                | Y                        |
| Reticulocyte count          | <i>PLIN1</i> pLOF | 4.11E-08 | -0.21 (-0.29, -0.14)      | 656                                | Y                        |
| Reticulocyte percentage     | <i>PLIN1</i> pLOF | 5.31E-07 | -0.20 (-0.27, -0.12)      | 656                                | Y                        |
| Hip circumference           | <i>PLIN1</i> pLOF | 3.34E-06 | 0.18 (0.10, 0.25)         | 682                                | Y                        |
| HLS reticulocyte count      | <i>PLIN1</i> pLOF | 4.65E-06 | -0.18 (-0.25, -0.1)       | 656                                | Y                        |
| Leukocyte count             | <i>PLIN1</i> pLOF | 9.54E-06 | -0.17 (-0.25, -0.095)     | 665                                | Y                        |
| HLS reticulocyte percentage | <i>PLIN1</i> pLOF | 4.52E-05 | -0.16 (-0.24, -0.083)     | 656                                | Y                        |
| ApoB                        | <i>PLIN1</i> pLOF | 6.77E-04 | -0.13 (-0.21, -0.056)     | 649                                | N                        |
| LDL adj medication          | <i>PLIN1</i> pLOF | 0.004    | -0.11 (-0.19, -0.035)     | 652                                | N                        |
| Diastolic BP                | <i>PLIN1</i> pLOF | 0.02     | -0.08 (-0.15, -0.01)      | 636                                | N                        |
| Systolic BP                 | <i>PLIN1</i> pLOF | 0.03     | -0.08 (-0.16, -0.007)     | 636                                | N                        |
| HbA1c                       | <i>PLIN1</i> pLOF | 0.08     | -0.065 (-0.14, 0.007)     | 656                                | N                        |
| BMI                         | <i>PLIN1</i> pLOF | 0.08     | 0.067 (-0.008, 0.14)      | 669                                | N                        |
| LDL cholesterol             | <i>PLIN1</i> pLOF | 0.09     | -0.066 (-0.14, 0.011)     | 652                                | N                        |
| Waist circumference         | <i>PLIN1</i> pLOF | 0.34     | -0.032 (-0.098, 0.034)    | 682                                | N                        |
| ASATadjBMI                  | <i>PLIN1</i> pLOF | 0.21     | 0.21 (-0.12, 0.54)        | 36                                 | N                        |
| VATadjBMI                   | <i>PLIN1</i> pLOF | 0.88     | -0.025 (-0.35, 0.3)       | 36                                 | N                        |
| Type 2 diabetes             | <i>PLIN1</i> pLOF | 0.11     | 0.81 (0.62, 1.05)         | 52                                 | N                        |
| Coronary Heart Disease      | <i>PLIN1</i> pLOF | 0.07     | 0.81 (0.65, 1.02)         | 79                                 | N                        |
| Essential hypertension      | <i>PLIN1</i> pLOF | 0.53     | 0.95 (0.8, 1.12)          | 241                                | N                        |

## AMP-T2D-GENES Consortium members

Carlos A. Aguilar-Salinas<sup>1</sup>, Gil Atzmon<sup>2,3,4</sup>, Francisco Barajas-Olmos<sup>5</sup>, Nir Barzilai<sup>2,4</sup>, John Blangero<sup>6</sup>, Eric Boerwinkle<sup>7,8</sup>, Lori L. Bonnycastle<sup>9</sup>, Erwin Bottinger<sup>10</sup>, Donald W Bowden<sup>11,12,13</sup>, Federico Centeno-Cruz<sup>5</sup>, John C. Chambers<sup>14,15</sup>, Edmund Chan<sup>16</sup>, Juliana Chan<sup>17,18,19,20</sup>, Ching-Yu Cheng<sup>21,22,23</sup>, Yoon Shin Cho<sup>24</sup>, Cecilia Contreras-Cubas<sup>5</sup>, Emilio Córdova<sup>5</sup>, Adolfo Correa<sup>25</sup>, Ralph A. DeFronzo<sup>26</sup>, Ravindranath Duggirala<sup>6</sup>, José Dupuis<sup>27</sup>, Humberto García-Ortiz<sup>5</sup>, Christian Gieger<sup>28,29,30</sup>, Benjamin Glaser<sup>31</sup>, Clicerio Gonzalez<sup>32</sup>, Ma Elena Gonzalez<sup>33</sup>, Niels Grarup<sup>34</sup>, Leif Groop<sup>35,36</sup>, Myron Gross<sup>37</sup>, Christopher Haiman<sup>38</sup>, Sohee Han<sup>39</sup>, Craig L. Hanis<sup>7</sup>, Torben Hansen<sup>34</sup>, Nancy L. Heard-Costa<sup>40,41</sup>, Brian E. Henderson<sup>38</sup>, Juan Manuel Malacara Hernandez<sup>42</sup>, Mi Yeong Hwang<sup>39</sup>, Sergio Islas-Andrade<sup>5</sup>, Marit E. Jørgensen<sup>43,44,45</sup>, Hyun Min Kang<sup>46</sup>, Bong-Jo Kim<sup>39</sup>, Young Jin Kim<sup>39</sup>, Heikki A. Koistinen<sup>47,48,49</sup>, Jaspal Singh Kooner<sup>50,51,52</sup>, Johanna Kuusisto<sup>53</sup>, Soo Heon Kwak<sup>54</sup>, Markku Laakso<sup>53</sup>, Leslie A. Lange<sup>55</sup>, Juyoung Lee<sup>39</sup>, Jong-Young Lee<sup>56</sup>, Donna M. Lehman<sup>26</sup>, Allan Linneberg<sup>57,58,59</sup>, Jianjun Liu<sup>16,60,61</sup>, Ruth Loos<sup>10,62</sup>, Valeriya Lyssenko<sup>33,63</sup>, Ronald C.W. Ma<sup>17,18,19,20</sup>, Angélica Martínez-Hernández<sup>5</sup>, James B. Meigs<sup>64,65,66</sup>, Thomas Meitinger<sup>67,68</sup>, Elvia Mendoza-Caamal<sup>5</sup>, Karen L. Mohlke<sup>69</sup>, Andrew D. Morris<sup>70,71</sup>, Alanna C. Morrison<sup>7,72</sup>, Maggie C.Y. Ng<sup>11,12,13</sup>, Peter Nilsson<sup>73</sup>, Christopher J. O'Donnell<sup>74,75,76,77</sup>, Lorena Orozco<sup>5</sup>, Colin N.A. Palmer<sup>78</sup>, Kyong Soo Park<sup>54,79,80</sup>, Oluf Pedersen<sup>34</sup>, Wendy S. Post<sup>81</sup>, Michael Preuss<sup>10</sup>, Bruce M. Psaty<sup>82,83</sup>, Ramachandran S. Vasan<sup>40,84</sup>, Alexander P. Reiner<sup>85</sup>, Cristina Revilla-Monsalve<sup>5</sup>, Stephen S. Rich<sup>86</sup>, Jerome I. Rotter<sup>87</sup>, Zhe Wang<sup>10</sup>, Maria Eugenia Garay Sevilla<sup>88,89</sup>, Xueling Sim<sup>60</sup>, Rob Sladek<sup>90,91,92</sup>, Kerrin S. Small<sup>93</sup>, Wing Yee So<sup>17,18,19</sup>, Timothy D. Spector<sup>93</sup>, Konstantin Strauch<sup>29,94</sup>, Tim M. Strom<sup>67,95</sup>, E-Shyong Tai<sup>16,60,96</sup>, Claudia H.T. Tam<sup>17,18,19</sup>, Yik Ying Teo<sup>60,96</sup>, Farook Thameem<sup>97</sup>, Brain Tomlinson<sup>98</sup>, Russell P. Tracy<sup>99,100</sup>, Tiinamaija Tuomi<sup>101,102</sup>, Jaakko Tuomilehto<sup>103,104,105,106</sup>, Teresa Tusié-Luna<sup>107,108</sup>, Rob M. van Dam<sup>16,60,109</sup>, James G. Wilson<sup>110</sup>, Daniel R. Witte<sup>111,112</sup>, Tien-Yin Wong<sup>21,22,23</sup>, Peter Dornbos<sup>64,74,113</sup>, Jason A. Flannick<sup>64,74,113</sup>, Jose C. Florez<sup>64,65,114</sup>, Mark I. McCarthy<sup>115</sup>, Michael Boehnke<sup>46</sup>, Noël P. Burt<sup>64</sup>

### Affiliations:

<sup>1</sup>Instituto Nacional de Ciencias Medicas y Nutricion, Mexico City, Mexico

<sup>2</sup>Department of Medicine, Albert Einstein College of Medicine, New York, NY, USA. <sup>3</sup>Faculty of Natural Science, University of Haifa, Haifa, Israel.

<sup>4</sup>Department of Genetics, Albert Einstein College of Medicine, New York, NY, USA

<sup>5</sup>Instituto Nacional de Medicina Genómica, Mexico City, Mexico

<sup>6</sup>Department of Human Genetics and South Texas Diabetes and Obesity Institute, University of Texas Rio Grande Valley, Brownsville and Edinburg, TX, USA

<sup>7</sup>Human Genetics Center, School of Public Health, The University of Texas Health Science Center at Houston, Houston, TX, USA

<sup>8</sup>Human Genome Sequencing Center, Baylor College of Medicine, Houston, TX, USA.

<sup>9</sup>Medical Genomics and Metabolic Genetics Branch, National Human Genome Research Institute, National Institutes of Health, Bethesda, MD, USA

<sup>10</sup>The Charles Bronfman Institute for Personalized Medicine, Icahn School of Medicine at Mount Sinai, New York, NY, USA

- <sup>11</sup>Center for Diabetes Research, Wake Forest School of Medicine, Winston-Salem, NC, USA.
- <sup>12</sup>Center for Genomics and Personalized Medicine Research, Wake Forest School of Medicine, Winston-Salem, NC, USA.
- <sup>13</sup>Department of Biochemistry, Wake Forest School of Medicine, Winston-Salem, NC, USA.
- <sup>14</sup>Department of Epidemiology and Biostatistics, Imperial College London, London, UK.
- <sup>15</sup>Lee Kong Chian School of Medicine, Nanyang Technological University, Singapore, Singapore.
- <sup>16</sup>Department of Medicine, Yong Loo Lin School of Medicine, National University of Singapore and National University Health System, Singapore, Singapore.
- <sup>17</sup>Department of Medicine and Therapeutics, The Chinese University of Hong Kong, Hong Kong, China.
- <sup>18</sup>Chinese University of Hong Kong-Shanghai Jiao Tong University Joint Research Centre in Diabetes Genomics and Precision Medicine, The Chinese University of Hong Kong, Hong Kong, China.
- <sup>19</sup>Hong Kong Institute of Diabetes and Obesity, The Chinese University of Hong Kong, Hong Kong, China.
- <sup>20</sup>Li Ka Shing Institute of Health Sciences, The Chinese University of Hong Kong, Hong Kong, China.
- <sup>21</sup>Singapore Eye Research Institute, Singapore National Eye Centre, Singapore, Singapore
- <sup>22</sup>Ophthalmology & Visual Sciences Academic Clinical Program (Eye ACP), Duke-NUS Medical School, Singapore, Singapore
- <sup>23</sup>Department of Ophthalmology, Yong Loo Lin School of Medicine, National University of Singapore and National University Health System, Singapore, Singapore.
- <sup>24</sup>Department of Biomedical Science, Hallym University, Chuncheon, South Korea
- <sup>25</sup>Department of Medicine, University of Mississippi Medical Center, Jackson, MS, USA.
- <sup>26</sup>Department of Medicine, University of Texas Health San Antonio (aka University of Texas Health Science Center at San Antonio), San Antonio, TX, USA
- <sup>27</sup>Department of Biostatistics, Boston University School of Public Health, Boston, MA, USA.
- <sup>28</sup>Research Unit Molecular Epidemiology, Helmholtz Zentrum München, German Research Center for Environmental Health, Neuherberg, Germany.
- <sup>29</sup>Institute of Epidemiology, Helmholtz Zentrum München, German Research Center for Environmental Health, Neuherberg, Germany.
- <sup>30</sup>German Center for Diabetes Research (DZD), Neuherberg, Germany.
- <sup>31</sup>Endocrinology and Metabolism Service, Hadassah-Hebrew University Medical Center, Jerusalem, Israel.
- <sup>32</sup>Unidad de Investigacion en Diabetes y Riesgo Cardiovascular, Instituto Nacional de Salud Publica, Cuernavaca, Mexico.

- <sup>33</sup>Centro de Estudios en Diabetes, Mexico City, Mexico.
- <sup>34</sup>Novo Nordisk Foundation Center for Basic Metabolic Research, Faculty of Health and Medical Sciences, University of Copenhagen, Copenhagen, Denmark.
- <sup>35</sup>Department of Clinical Sciences, Diabetes and Endocrinology, Lund University Diabetes Centre, Malmö, Sweden.
- <sup>36</sup>Institute for Molecular Medicine Finland, University of Helsinki, Helsinki, Finland.
- <sup>37</sup>Department of Laboratory Medicine and Pathology, University of Minnesota, Minneapolis, MN, USA.
- <sup>38</sup>Department of Preventive Medicine, Keck School of Medicine of USC, Los Angeles, CA, USA.
- <sup>39</sup>Division of Genome Research, Center for Genome Science, National Institute of Health, Chungcheongbuk-do, South Korea.
- <sup>40</sup>Boston University and National Heart Lung and Blood Institute's Framingham Heart Study, Framingham, MA, USA.
- <sup>41</sup>Department of Neurology, Boston University School of Medicine, Boston, MA, USA.
- <sup>42</sup>Department of Medical Science, División of Health Science. University of Guanajuato. Campus León. León, Gto. México.
- <sup>43</sup>Steno Diabetes Center Copenhagen, Gentofte, Denmark.
- <sup>44</sup>National Institute of Public Health, University of Southern Denmark, Copenhagen, Denmark.
- <sup>45</sup>Greenland Centre for Health Research, University of Greenland, Nuuk, Greenland.
- <sup>46</sup>Department of Biostatistics and Center for Statistical Genetics, University of Michigan, Ann Arbor, MI, USA.
- <sup>47</sup>Department of Public Health Solutions, Finnish Institute for Health and Welfare, Helsinki, Finland.
- <sup>48</sup>University of Helsinki and Department of Medicine, Helsinki University Central Hospital, Helsinki, Finland.
- <sup>49</sup>Minerva Foundation Institute for Medical Research, Helsinki, Finland.
- <sup>50</sup>Department of Cardiology, Ealing Hospital, London North West Healthcare NHS Trust, London, UK.
- <sup>51</sup>MRC-PHE Centre for Environment and Health, Imperial College London, London, UK. Imperial College Healthcare NHS Trust, Imperial College London, London, UK. <sup>52</sup>National Heart and Lung Institute, Imperial College London, London, UK.
- <sup>53</sup>Institute of Clinical Medicine, Internal Medicine, University of Eastern Finland and Kuopio University Hospital, Kuopio, Finland.
- <sup>54</sup>Department of Internal Medicine, Seoul National University Hospital, Seoul, South Korea.
- <sup>55</sup>Department of Medicine, University of Colorado Denver, Anschutz Medical Campus, Aurora, CO, USA.



- <sup>56</sup>Oneomics Soonchunhyang Mirae Medical Center, Bucheon-si Gyeonggi-do, Republic of Korea.
- <sup>57</sup>Department of Clinical Medicine, Faculty of Health and Medical Sciences, University of Copenhagen, Copenhagen, Denmark.
- <sup>58</sup>Center for Clinical Research and Prevention, Bispebjerg and Frederiksberg Hospital, Copenhagen, Denmark.
- <sup>59</sup>Department of Clinical Experimental Research, Rigshospitalet, Copenhagen, Denmark.
- <sup>60</sup>Saw Swee Hock School of Public Health, National University of Singapore and National University Health System, Singapore, Singapore.
- <sup>61</sup>Genome Institute of Singapore, Agency for Science Technology and Research, Singapore, Singapore.
- <sup>62</sup>The Mindich Child Health and Development Institute, Ichan School of Medicine at Mount Sinai, New York, NY, USA.
- <sup>63</sup>Department of Clinical Science, University of Bergen, Bergen, Norway.
- <sup>64</sup>Program in Medical and Population Genetics, Broad Institute of MIT and Harvard, Cambridge, MA, USA.
- <sup>65</sup>Department of Medicine, Harvard Medical School, Boston, MA, USA.
- <sup>66</sup>Division of General Internal Medicine, Massachusetts General Hospital, Boston, MA, USA.
- <sup>67</sup>Institute of Human Genetics, Technical University of Munich, Munich, Germany.
- <sup>68</sup>German Centre for Cardiovascular Research (DZHK), Partner Site Munich Heart Alliance, Munich, Germany.
- <sup>69</sup>Department of Genetics, University of North Carolina Chapel Hill, Chapel Hill, NC, USA.
- <sup>70</sup>Wellcome Centre for Human Genetics, Nuffield Department of Medicine, University of Oxford, Oxford, UK.
- <sup>71</sup>Department of Biostatistics, University of Liverpool, Liverpool, UK.
- <sup>72</sup>Department of Epidemiology, Human Genetics, and Environmental Sciences, School of Public Health, The University of Texas Health Science Center at Houston, Houston, TX, USA.
- <sup>73</sup>Department of Clinical Sciences, Medicine, Lund University, Malmö, Sweden.
- <sup>74</sup>Department of Pediatrics, Harvard Medical School, Boston, MA, USA.
- <sup>75</sup>Section of Cardiology, Department of Medicine, VA Boston Healthcare, Boston, MA, USA.
- <sup>76</sup>Brigham and Women's, Hospital, Boston, MA, USA.
- <sup>77</sup>Intramural Administration Management Branch, National Heart Lung and Blood Institute, NIH, Framingham, MA, USA.

<sup>78</sup>Pat Macpherson Centre for Pharmacogenetics and Pharmacogenomics, University of Dundee, Dundee, UK

<sup>79</sup>Department of Internal Medicine, Seoul National University College of Medicine, Seoul, South Korea.

<sup>80</sup>Department of Molecular Medicine and Biopharmaceutical Sciences, Graduate School of Convergence Science and Technology, Seoul National University, Seoul, South Korea.

<sup>81</sup>Division of Cardiology, Department of Medicine, Johns Hopkins University, Baltimore, MD, USA.

<sup>82</sup>Cardiovascular Health Research Unit, Departments of Medicine, Epidemiology, and Health Services, University of Washington, Seattle, WA, USA.

<sup>83</sup>Kaiser Permanente Washington Research Institute, Seattle, WA, USA.

<sup>84</sup>Preventive Medicine & Epidemiology, and Cardiovascular Medicine, Medicine, Boston University School of Medicine, and Epidemiology, Boston University School of Public health, Boston, MA, USA.

<sup>85</sup>Fred Hutchinson Cancer Research Center, Seattle, WA, USA.

<sup>86</sup>Center for Public Health Genomics, University of Virginia School of Medicine, Charlottesville, VA, USA

<sup>87</sup>The Institute for Translational Genomics and Population Sciences, Department of Pediatrics, The Lundquist Institute for Biomedical Innovation (formerly Los Angeles Biomedical Research Institute) at Harbor-UCLA Medical Center, Torrance, CA, USA.

<sup>88</sup>Digital Health Center, Hasso Plattner Institute, University of Potsdam, Prof.-Dr.-Helmert-Str. 2-3, Potsdam, Germany.

<sup>89</sup>Hasso Plattner Institute for Digital Health at Mount Sinai, Icahn School of Medicine at Mount Sinai, One Gustave L. Levy Place, New York, NY, USA.

<sup>90</sup>Department of Human Genetics, McGill University, Montreal, QC, Canada.

<sup>91</sup>Division of Endocrinology and Metabolism, Department of Medicine, McGill University, Montreal, QC, Canada.

<sup>92</sup>McGill University and Génome Québec Innovation Centre, Montreal, QC, Canada.

<sup>93</sup>Department of Twin Research and Genetic Epidemiology, King's College London, London, UK.

<sup>94</sup>Institute for Medical Informatics Biometry and Epidemiology, Ludwig-Maximilians University, Munich, Germany.

<sup>95</sup>Institute of Human Genetics, Helmholtz Zentrum München, German Research Center for Environmental Health, Neuherberg, Germany.

<sup>96</sup>Life Sciences Institute, National University of Singapore, Singapore, Singapore.

<sup>97</sup>Department of Biochemistry, Faculty of Medicine, Health Science Center, Kuwait University, Safat, Kuwait.

<sup>98</sup>Faculty of Medicine, Macau University of Science & Technology, Macau, China.

- <sup>99</sup>Department of Pathology and Laboratory Medicine, The Robert Larner M.D. College of Medicine, University of Vermont, Burlington, VT, USA.
- <sup>100</sup>Department of Biochemistry, The Robert Larner M.D. College of Medicine, University of Vermont, Burlington, VT, USA.
- <sup>101</sup>Department of Endocrinology, Abdominal Centre, Helsinki University Hospital, Helsinki, Finland; Institute for Molecular Medicine Finland, University of Helsinki, Helsinki, Finland
- <sup>102</sup>Folkhaalsan Research Centre, Helsinki, Finland; Research Programs Unit, Clinical and Molecular Medicine, University of Helsinki, Helsinki, Finland.
- <sup>103</sup>Diabetes Prevention Unit, National Institute for Health and Welfare, Helsinki, Finland.
- <sup>104</sup>Center for Vascular Prevention, Danube University Krems, Krems, Austria.
- <sup>105</sup>Diabetes Research Group, King Abdulaziz University, Jeddah, Saudi Arabia.
- <sup>106</sup>Instituto de Investigacion Sanitaria del Hospital Universitario LaPaz (IdiPAZ), University Hospital LaPaz, Autonomous University of Madrid, Madrid, Spain.
- <sup>107</sup>Unidad de Biología Molecular y Medicina Genómica, Instituto Nacional de Ciencias Médicas y Nutrición Salvador Zubirán, Mexico City, Mexico.
- <sup>108</sup>Departamento de Medicina Genómica y Toxicología Ambiental, Instituto de Investigaciones Biomédicas, UNAM, Mexico City, Mexico.
- <sup>109</sup>Department of Nutrition, Harvard T.H. Chan School of Public Health, Boston, MA, USA.
- <sup>110</sup>Department of Physiology and Biophysics, University of Mississippi Medical Center, Jackson, MS, USA.
- <sup>111</sup>Department of Public Health, Aarhus University, Aarhus, Denmark.
- <sup>112</sup>Danish Diabetes Academy, Odense, Denmark.
- <sup>113</sup>Boston Children's Hospital, Boston, Massachusetts, USA.
- <sup>114</sup>Diabetes Unit and Center for Genomic Medicine, Massachusetts General Hospital, Boston, MA, USA.
- <sup>115</sup>Genentech, South San Francisco, California, USA.

## Supplementary References

1. Emdin CA, *et al.* Genetic Association of Waist-to-Hip Ratio With Cardiometabolic Traits, Type 2 Diabetes, and Coronary Heart Disease. *JAMA* **317**, 626-634 (2017).
2. Ferkingstad E, *et al.* Large-scale integration of the plasma proteome with genetics and disease. *Nat Genet* **53**, 1712-1721 (2021).
